# Supplementary material for: Machine learning-guided discovery and design of non-hemolytic peptides
Source: PubMed Central journal article supplement (PMC7538962; doi:10.1038/s41598-020-73644-6), 2020-10-06
Supplement: 41598_2020_73644_MOESM1_ESM.pdf [file 41598_2020_73644_MOESM1_ESM.pdf]

# Machine learning-guided discovery and design of non-hemolytic peptides

Fabien Plisson<sup>1,\*</sup>, Obed Ramírez-Sánchez<sup>1</sup>, Cristina Martínez-Hernández<sup>1</sup>

<sup>1</sup>CONACYT, Centro de Investigación y de Estudios Avanzados del IPN, Unidad de Genómica Avanzada, Laboratorio Nacional de Genómica para la Biodiversidad (Langebio), Irapuato, Guanajuato 36824, México.

\* Fabien Plisson; fabien.plisson@cinvestav.mx

## Table of Contents

|                                                                                                                                                                                                                                                                                                                 |    |
|-----------------------------------------------------------------------------------------------------------------------------------------------------------------------------------------------------------------------------------------------------------------------------------------------------------------|----|
| <b>Abbreviations</b>                                                                                                                                                                                                                                                                                            | 3  |
| <b>List S1.</b> Physicochemical descriptors (56)                                                                                                                                                                                                                                                                | 4  |
| <b>Table S1a.</b> Performance metrics of 13 binary classifiers for predicting hemolytic activity using HemoPI-1 model/validation datasets and 56 sequence-based physicochemical descriptors.                                                                                                                    | 5  |
| <b>Table S1b.</b> Performance metrics of 13 binary classifiers for predicting hemolytic activity using HemoPI-2 model/validation datasets and 56 sequence-based physicochemical descriptors.                                                                                                                    | 6  |
| <b>Table S1c.</b> Performance metrics of 13 binary classifiers for predicting hemolytic activity using HemoPI-3 model/validation datasets and 56 sequence-based physicochemical descriptors.                                                                                                                    | 7  |
| <b>Table S2.</b> Mean accuracies of top binary classifiers for the 3 different model/validation datasets (HemoPI-1, HemoPI-2, HemoPI-3) using optimal number of physicochemical descriptors after applying feature reduction methods: multicollinearity, recursive feature extraction and backward elimination. | 8  |
| <b>Table S3.</b> Mean accuracies (%) of top performing Gradient Boosting Classifier (GBC) for model/validation datasets (HemoPI-1, HemoPI-2, HemoPI-3) after reducing the number of features (N: physicochemical descriptors) using multicollinearity and correlation thresholds (0.75-0.95).                   | 9  |
| <b>Table S4a.</b> Performance metrics of leading binary classifiers for HemoPI-1 model/validation datasets after optimizing their respective hyperparameters with full or reduced number of features (multicollinearity, recursive feature extraction).                                                         | 10 |
| <b>Table S4b.</b> Performance metrics of leading binary classifiers for HemoPI-2 model/validation datasets after optimizing their respective hyperparameters with full or reduced number of features (multicollinearity, recursive feature extraction).                                                         | 11 |
| <b>Table S4c.</b> Performance metrics of leading binary classifiers for HemoPI-3 model/validation datasets after optimizing their respective hyperparameters with full or reduced number of features (multicollinearity, recursive feature extraction).                                                         | 12 |
| <b>Table S5a.</b> Performance metrics of binary classifier Extreme Gradient Boosting (XGBC) for HemoPI datasets with full or reduced number of features (multicollinearity, recursive feature elimination) using default model hyperparameters.                                                                 | 13 |

|                                                                                                                                                                                                                                                                            |    |
|----------------------------------------------------------------------------------------------------------------------------------------------------------------------------------------------------------------------------------------------------------------------------|----|
| <b>Table S5b.</b> Performance metrics of binary classifier Extreme Gradient Boosting (XGBC) for HemoPI datasets with full or reduced number of features (multicollinearity, recursive feature elimination) using optimised model hyperparameters.                          | 14 |
| <b>Table S6.</b> Inliers, novelties (model datasets) and outliers (APD and HAMP datasets) counts applying empirical rule to Mahalanobis distances for HemoPI datasets.                                                                                                     | 15 |
| <b>Table S7.</b> Inliers, novelties and outliers counts applying multivariate outlier detection methods to 56-dimensional datasets HemoPI-1, HemoPI-2, HemoPI-3, Antimicrobial Peptide Dataset (APD, 3081) and known haemolytic antimicrobial peptides in APD (HAMP, 317). | 16 |
| <b>Table S8.</b> Consensus class probabilities and outlier scores of APD dataset (additional spreadsheet)                                                                                                                                                                  |    |
| <b>Table S9.</b> Statistical values (p-value and p-adjust) for all 56 physicochemical properties.                                                                                                                                                                          | 17 |
| <b>Table S10.</b> Descriptive statistics for 56 physicochemical property distributions (APD inliers).                                                                                                                                                                      | 19 |
| <b>Table S11.</b> Descriptive statistics for 56 physicochemical property distributions (APD outliers).                                                                                                                                                                     | 21 |
| <b>Table S12.</b> Amino acid composition for specific random peptide sequences (RPS).                                                                                                                                                                                      | 23 |
| <b>Table S13.</b> Amino acid compositions for APD and RPS datasets.                                                                                                                                                                                                        | 23 |
| <b>Figure S1a.</b> Feature Importances of top 3 binary classifiers for HemoPI-1 dataset.                                                                                                                                                                                   | 24 |
| <b>Figure S1b.</b> Feature Importances of top 3 binary classifiers for HemoPI-2 dataset.                                                                                                                                                                                   | 25 |
| <b>Figure S1c.</b> Feature Importances of top 3 binary classifiers for HemoPI-3 dataset.                                                                                                                                                                                   | 26 |
| <b>Figure S2.</b> Quality curves RNX(K) report the relative improvement over 17 different embedding techniques for HemoPI-1 model dataset.                                                                                                                                 | 27 |
| <b>Figure S3.</b> Statistical studies to identify differences between the distributions of 56 physicochemical properties from two groups; APD inliers and outliers.                                                                                                        | 28 |
| <b>Figure S4a.</b> Boxplots comparing the distributions of physicochemical properties 1-16 within inliers (cyan) and outliers (dark blue) groups.                                                                                                                          | 29 |
| <b>Figure S4b.</b> Boxplots comparing the distributions of physicochemical properties 17-32 within inliers (cyan) and outliers (dark blue) groups.                                                                                                                         | 30 |
| <b>Figure S4c.</b> Boxplots comparing the distributions of physicochemical properties 33-48 within inliers (cyan) and outliers (dark blue) groups.                                                                                                                         | 31 |
| <b>Figure S4d.</b> Boxplots comparing the distributions of physicochemical properties 49-56 within inliers (cyan) and outliers (dark blue) groups.                                                                                                                         | 32 |
| <b>Figure S5.</b> Scatterplots showing the distribution of 3,081 antimicrobial peptides (APD dataset) according to outlier scores and hemolytic (HemoPI-1) consensus class probabilities.                                                                                  | 33 |

## Abbreviations

|          |                                                         |
|----------|---------------------------------------------------------|
| LOGREG   | Logistic Regression                                     |
| KNN      | K-Nearest Neighbour                                     |
| CART     | Classification and Regression (Decision) Tree           |
| RFC      | Random Forest Classifier                                |
| GBC      | Gradient Boosting Classifier                            |
| ADC      | Adaboost Classifier                                     |
| LDA      | Linear Discriminant Analysis                            |
| QDA      | Quadratic Discriminant Analysis                         |
| NB       | Naïve Bayes                                             |
| SVC-LIN  | Support Vector Classifier, linear kernel                |
| SVC-RBF  | Support Vector Classifier, radial basis function kernel |
| SVC-POLY | Support Vector Classifier, polynomial kernel            |
| SVC-SIG  | Support Vector Classifier, sigmoid kernel               |
| XGBC     | Extreme Gradient Boosting Classifier                    |
| Acc.     | Accuracy                                                |
| Prec.    | Precision                                               |
| MCC      | Matthews Correlation Coefficient                        |
| CK       | Cohen's kappa                                           |
| AUC ROC  | Area under curve Receiver Operating Characteristic      |
| ABOD     | Angle-based Outlier Detector                            |
| CBLOF    | Cluster-based Local Outlier Factor                      |
| FB       | Feature Bagging                                         |
| HBOS     | Histogram-Based Outlier Detector                        |
| IF       | Isolation Forest                                        |
| KNN      | K-Nearest Neighbour                                     |
| LOF      | Local Outlier Factor                                    |
| t-SNE    | t-distributed Stochastic Neighbour Embedding            |

For all following results, each dataset was divided into a model set (80%) and an external validation set (20%), and both were subjected to stratified 10-fold cross-validation.

**List S1.** Physicochemical descriptors (56) – first 9 global descriptors and 47 peptide descriptors. Implementation using Python modules and references for all descriptors at <https://modlamp.org/modlamp.html#module-modlamp.descriptors>

**Aromaticity:** calculated global aromaticity, relative frequency of Phe+Trp+Tyr

**AliphaticIndex:** calculated aliphatic index of a sequence, a measure of thermal stability using amino acids Ala, Ile, Leu, Val

**BomanIndex:** calculated Boman index, a measure for protein-protein interactions

**HydrophobicRatio:** calculated hydrophobic ratio, relative frequency of Ala, Cys, Phe, Ile, Leu, Met and Val.

**InstabilityIndex:** calculated peptide stability from a sequence,

**Length:** peptide length

**MW:** calculated molecular weight of a sequence

**NetCharge:** calculated charge at pH 7.4 for a sequence

**IsoelectricPoint:** calculated isoelectric point of a sequence

**B\_Bulkiness:** index with amino acid side chain bulkiness scale

**uB\_Bulkiness:** moment with amino acid side chain bulkiness scale

**charge\_phys:** amino acid charge at pH 7.0 - Histidine charge +0.1.

**charge\_acid:** amino acid charge at acidic pH - Histidine charge +1.0

**Ez:** potential that assesses energies of insertion of amino acid side chains into lipid bilayers

**F\_Levitt:** index with Levitt amino acid alpha-helix propensity scale

**uF\_Levitt:** moment with Levitt amino acid alpha-helix propensity scale

**flexibility:** index with amino acid side chain flexibility scale

**u\_flexibility :** moment with amino acid side chain flexibility scale

**Grantham:** index for amino acid side chain composition, polarity and molecular volume

**H\_argos:** hydrophobicity index with Argos hydrophobicity amino acid scale

**uH\_argos:** hydrophobic moment with Argos hydrophobicity amino acid scale

**H\_Eisenberg:** hydrophobicity index with Eisenberg hydrophobicity amino acid scale

**uH\_Eisenberg:** hydrophobic moment with Eisenberg hydrophobicity amino acid scale

**H\_GRAVY:** hydrophobicity index with GRAVY hydrophobicity amino acid scale

**uH\_GRAVY:** hydrophobic moment with GRAVY hydrophobicity amino acid scale

**H\_HoppWoods:** hydrophobicity index with Hopp-Woods hydrophobicity amino acid scale

**uH\_HoppWoods:** hydrophobic moment with Hopp-Woods hydrophobicity amino acid scale

**H\_Janin:** hydrophobicity index with Janin hydrophobicity amino acid scale

**uH\_Janin:** hydrophobic moment with Janin hydrophobicity amino acid scale

**H\_KyteDoolittle:** hydrophobicity index with Kyte & Doolittle hydrophobicity amino acid scale

**uH\_KyteDoolittle:** hydrophobic moment with Kyte & Doolittle hydrophobicity amino acid scale

**ISAECI:** index for Isotropic Surface Area (ISA) and Electronic Charge Index (ECI) of amino acid side chains

**modlabs\_ABHPRK:** modlabs inhouse physicochemical feature scale (Acidic, Basic, Hydrophobic, Polar, aRomatic, Kink-inducer)

**MSS\_shape:** a graph-theoretical index that reflects topological shape and size of amino acid side chains

**u\_MSS\_shape** moment of a graph-theoretical index that reflects topological shape and size of amino acid side chains

**MSW:** amino acid scale based on a PCA of the molecular surface based WHIM descriptor (MS-WHIM), extended to natural amino acids

**pepArc:** modlabs pharmacophoric feature scale, dimensions are: hydrophobicity, polarity, positive charge, negative charge, proline.

**pepcats:** modlabs pharmacophoric feature based PEPCATS scale

**polarity:** index using amino acid polarity scale

**u\_polarity:** moment with amino acid polarity scale

**PPCALI:** modlabs inhouse scale derived from a PCA of 143 amino acid property scales

**refractivity:** relative amino acid refractivity values

**u\_refractivity:** relative amino acid refractivity moment

**S\_AASI:** index with an amino acid selectivity index scale for helical antimicrobial peptides

**uS\_AASI:** moment with an amino acid selectivity index scale for helical antimicrobial peptides

**t\_scale:** global t scale, A PCA derived scale based on amino acid side chain properties calculated with 6 different probes of the GRID program

**TM\_tend:** index with amino acid transmembrane propensity scale

**u\_TM\_tend:** moment with amino acid transmembrane propensity scale moment

**Z3\_1, Z3\_2, Z3\_3:** original three dimensional Z-scale

**Z5\_1, Z5\_2, Z5\_3, Z5\_4, Z5\_5:** extended five dimensional Z-scale

| HemoPI-1    | Model (442/442) |              |       |       |            | Validation (110/110) |              |       |       |            |
|-------------|-----------------|--------------|-------|-------|------------|----------------------|--------------|-------|-------|------------|
| Classifiers | Acc.<br>(%)     | Prec.<br>(%) | MCC   | CK    | AUC<br>ROC | Acc.<br>(%)          | Prec.<br>(%) | MCC   | CK    | AUC<br>ROC |
| LOGREG      | 92.6            | 89.4         | 0.853 | 0.853 | 0.926      | 89.6                 | 84.7         | 0.792 | 0.791 | 0.896      |
| KNN         | 93.2            | 89.6         | 0.865 | 0.864 | 0.932      | 86.8                 | 81.1         | 0.738 | 0.736 | 0.868      |
| CART        | 90.4            | 85.8         | 0.808 | 0.808 | 0.904      | 83.7                 | 77.6         | 0.674 | 0.673 | 0.837      |
| RFC         | 93.8            | 91.1         | 0.876 | 0.876 | 0.938      | 87.3                 | 81.8         | 0.747 | 0.746 | 0.873      |
| GBC         | 94.0            | 91.3         | 0.880 | 0.880 | 0.940      | 90.4                 | 86.5         | 0.809 | 0.809 | 0.905      |
| ADC         | 93.8            | 90.7         | 0.876 | 0.876 | 0.938      | 91.4                 | 87.4         | 0.828 | 0.828 | 0.914      |
| LDA         | 94.2            | 91.1         | 0.885 | 0.885 | 0.943      | 90.5                 | 87.1         | 0.809 | 0.809 | 0.905      |
| QDA         | 91.5            | 88.3         | 0.830 | 0.830 | 0.915      | 85.5                 | 83.8         | 0.727 | 0.709 | 0.854      |
| NB          | 85.9            | 82.3         | 0.721 | 0.717 | 0.859      | 85.5                 | 81.0         | 0.710 | 0.709 | 0.855      |
| SVC-LIN     | 88.1            | 84.2         | 0.763 | 0.762 | 0.881      | 85.0                 | 81.1         | 0.703 | 0.700 | 0.850      |
| SVC-RBF     | 88.7            | 84.8         | 0.774 | 0.774 | 0.887      | 85.5                 | 81.0         | 0.710 | 0.709 | 0.855      |
| SVC-POLY    | 71.5            | 71.4         | 0.521 | 0.430 | 0.715      | 60.0                 | 57.0         | 0.232 | 0.200 | 0.600      |
| SVC-SIG     | 88.0            | 84.1         | 0.761 | 0.760 | 0.880      | 81.8                 | 79.2         | 0.655 | 0.636 | 0.818      |

**Table S1a.** Performance metrics of 13 binary classifiers for predicting hemolytic activity using HemoPI-1 dataset and 56 sequence-based physicochemical descriptors. **Acc.** mean accuracy, **Prec.** mean precision, **MCC** Matthews correlation coefficient, **CK** Cohen’s kappa, **AUC ROC** Area under curve Receiver Operating Characteristic.

| HemoPI-2    | Model (442/370) |           |       |       |         | Validation (110/92) |           |       |       |         |
|-------------|-----------------|-----------|-------|-------|---------|---------------------|-----------|-------|-------|---------|
| Classifiers | Acc. (%)        | Prec. (%) | MCC   | CK    | AUC ROC | Acc. (%)            | Prec. (%) | MCC   | CK    | AUC ROC |
| LOGREG      | 68.0            | 65.2      | 0.350 | 0.348 | 0.672   | 65.8                | 63.2      | 0.305 | 0.298 | 0.646   |
| KNN         | 71.6            | 68.1      | 0.423 | 0.421 | 0.708   | 63.4                | 61.5      | 0.253 | 0.248 | 0.621   |
| CART        | 69.6            | 67.0      | 0.386 | 0.386 | 0.693   | 62.4                | 61.9      | 0.246 | 0.246 | 0.623   |
| RFC         | 69.0            | 66.0      | 0.370 | 0.368 | 0.682   | 63.9                | 62.1      | 0.265 | 0.262 | 0.629   |
| GBC         | 76.7            | 72.9      | 0.529 | 0.528 | 0.763   | 72.3                | 68.9      | 0.438 | 0.437 | 0.717   |
| ADC         | 71.3            | 68.1      | 0.419 | 0.418 | 0.708   | 73.8                | 70.2      | 0.469 | 0.468 | 0.732   |
| LDA         | 70.0            | 66.6      | 0.391 | 0.387 | 0.691   | 59.9                | 59.7      | 0.186 | 0.185 | 0.592   |
| QDA         | 66.4            | 64.5      | 0.322 | 0.322 | 0.661   | 60.9                | 60.5      | 0.208 | 0.208 | 0.604   |
| NB          | 62.3            | 61.7      | 0.243 | 0.243 | 0.622   | 63.4                | 62.0      | 0.257 | 0.256 | 0.627   |
| SVC-LIN     | 61.9            | 59.7      | 0.230 | 0.199 | 0.595   | 59.9                | 57.8      | 0.210 | 0.137 | 0.564   |
| SVC-RBF     | 63.7            | 61.2      | 0.262 | 0.244 | 0.618   | 62.4                | 59.7      | 0.252 | 0.200 | 0.595   |
| SVC-POLY    | 54.4            | 54.4      | 0.000 | 0.000 | 0.500   | 54.5                | 54.5      | 0.000 | 0.000 | 0.500   |
| SVC-SIG     | 59.6            | 57.7      | 0.195 | 0.133 | 0.563   | 54.5                | 54.5      | 0.000 | 0.000 | 0.500   |

**Table S1b.** Performance metrics of 13 binary classifiers for predicting hemolytic activity using HemoPI-2 dataset and 56 sequence-based physicochemical descriptors. **Acc.** mean accuracy, **Prec.** mean precision, **MCC** Matthews correlation coefficient, **CK** Cohen’s kappa, **AUC ROC** Area under curve receiver operating characteristic.

| HemoPI-3    | Model (708/590) |           |       |       |         | Validation (177/148) |           |       |        |         |
|-------------|-----------------|-----------|-------|-------|---------|----------------------|-----------|-------|--------|---------|
| Classifiers | Acc. (%)        | Prec. (%) | MCC   | CK    | AUC ROC | Acc. (%)             | Prec. (%) | MCC   | CK     | AUC ROC |
| LOGREG      | 69.7            | 66.1      | 0.386 | 0.377 | 0.685   | 70.8                 | 67.0      | 0.408 | 0.40.0 | 0.697   |
| KNN         | 72.8            | 69.3      | 0.449 | 0.447 | 0.722   | 65.8                 | 63.4      | 0.305 | 0.30.1 | 0.648   |
| CART        | 68.9            | 66.6      | 0.373 | 0.373 | 0.686   | 64.0                 | 62.7      | 0.273 | 0.273  | 0.636   |
| RFC         | 72.4            | 68.3      | 0.443 | 0.433 | 0.713   | 66.8                 | 64.1      | 0.325 | 0.320  | 0.658   |
| GBC         | 75.8            | 71.9      | 0.510 | 0.508 | 0.752   | 72.9                 | 69.4      | 0.452 | 0.450  | 0.724   |
| ADC         | 72.3            | 68.6      | 0.438 | 0.435 | 0.715   | 71.4                 | 68.1      | 0.420 | 0.419  | 0.708   |
| LDA         | 70.8            | 66.9      | 0.410 | 0.399 | 0.696   | 70.8                 | 67.3      | 0.407 | 0.403  | 0.699   |
| QDA         | 65.9            | 64.0      | 0.309 | 0.309 | 0.654   | 59.4                 | 59.1      | 0.172 | 0.169  | 0.583   |
| NB          | 64.4            | 62.8      | 0.278 | 0.277 | 0.638   | 65.9                 | 64.0      | 0.309 | 0.309  | 0.654   |
| SVC-LIN     | 65.4            | 62.0      | 0.309 | 0.272 | 0.630   | 66.5                 | 62.8      | 0.330 | 0.298  | 0.643   |
| SVC-RBF     | 66.3            | 62.7      | 0.325 | 0.292 | 0.641   | 66.1                 | 62.8      | 0.319 | 0.294  | 0.640   |
| SVC-POLY    | 54.6            | 54.6      | 0.000 | 0.000 | 0.500   | 54.5                 | 54.6      | 0.000 | 0.000  | 0.500   |
| SVC-SIG     | 63.4            | 60.4      | 0.272 | 0.224 | 0.606   | 63.4                 | 60.3      | 0.280 | 0.222  | 0.605   |

**Table S1c.** Performance metrics of 13 binary classifiers for predicting hemolytic activity using HemoPI-3 dataset and 56 sequence-based physicochemical descriptors. **Acc.** mean accuracy, **Prec.** mean precision, **MCC** Matthews correlation coefficient, **CK** Cohen’s kappa, **AUC ROC** Area under curve receiver operating characteristic.

| Classifier                            | Mean Accuracy (%) |             |             |                  |             |             |                  |             |             |
|---------------------------------------|-------------------|-------------|-------------|------------------|-------------|-------------|------------------|-------------|-------------|
|                                       | HemoPI-1 dataset  |             |             | HemoPI-2 dataset |             |             | HemoPI-3 dataset |             |             |
|                                       | N                 | Model       | Validation  | N                | Model       | Validation  | N                | Model       | Validation  |
| Multicollinearity (threshold = 0.75)  |                   |             |             |                  |             |             |                  |             |             |
| LOGREG                                | 26                | 92.8        | 86.4        | 27               | 66.3        | 66.3        | 28               | 69.6        | 70.5        |
| RFC                                   | 26                | 92.3        | 85.5        | 27               | 74.0        | 61.9        | 28               | 73.2        | 66.5        |
| GBC                                   | <b>26</b>         | <b>95.4</b> | <b>91.8</b> | <b>27</b>        | <b>77.5</b> | <b>71.3</b> | <b>28</b>        | <b>76.2</b> | <b>72.0</b> |
| LDA                                   | 26                | 93.4        | 90.0        | 27               | 68.4        | 63.4        | 28               | 70.3        | 72.0        |
| SVC-RBF                               | 26                | 89.6        | 84.6        | 27               | 64.2        | 62.9        | 28               | 65.3        | 66.5        |
| Recursive Feature Elimination (RFECV) |                   |             |             |                  |             |             |                  |             |             |
| RFC                                   | 34                | 94.9        | 90.0        | 34               | 72.8        | 69.8        | 22               | 75.0        | 69.2        |
| GBC                                   | 31                | 95.0        | 90.5        | <b>15</b>        | <b>77.8</b> | <b>73.3</b> | <b>55</b>        | <b>75.7</b> | <b>72.0</b> |
| LDA                                   | <b>18</b>         | <b>95.1</b> | <b>94.5</b> | 53               | 70.0        | 59.9        | 40               | 71.1        | 68.9        |
| Backward Elimination (BE)             |                   |             |             |                  |             |             |                  |             |             |
| RFC                                   | 23                | 93.7        | 85.9        | 16               | 74.9        | 64.9        | 18               | 74.4        | 65.9        |
| GBC                                   | 23                | 94.5        | 89.1        | 16               | 74.3        | 68.8        | 18               | 74.4        | 69.2        |
| LDA                                   | 23                | 94.1        | 93.6        | 16               | 70.1        | 65.4        | 18               | 72.0        | 70.2        |

**Table S2.** Mean accuracies (%) of top binary classifiers using the different model datasets (HemoPI-1, HemoPI-2, HemoPI-3). Classifiers are Logistic Regression (LOGREG), Random Forest (RFC), Gradient Boosting (GBC), Linear Discriminant Analysis (LDA) and Support Vector machine with radial basis function kernel (SVC-RBF) after applying 3 feature reduction methods; 10-fold cross-validation recursive feature elimination, backward elimination and multicollinearity and N, final number of features.



|                         | Model |      |      |      |             | Validation |      |      |      |             |
|-------------------------|-------|------|------|------|-------------|------------|------|------|------|-------------|
| Corr. threshold         | 0.95  | 0.90 | 0.85 | 0.80 | <b>0.75</b> | 0.95       | 0.90 | 0.85 | 0.80 | <b>0.75</b> |
| <i>HemoPI-1 dataset</i> |       |      |      |      |             |            |      |      |      |             |
| N descriptors           | 50    | 42   | 35   | 31   | <b>26</b>   | 50         | 42   | 35   | 31   | <b>26</b>   |
| GBC                     | 94.9  | 95.2 | 95.2 | 95.5 | <b>95.1</b> | 89.6       | 90.4 | 90.1 | 89.1 | <b>91.8</b> |
| <i>HemoPI-2 dataset</i> |       |      |      |      |             |            |      |      |      |             |
| N descriptors           | 51    | 44   | 36   | 32   | <b>27</b>   | 51         | 44   | 36   | 32   | <b>27</b>   |
| GBC                     | 74.6  | 75.4 | 75.3 | 75.4 | <b>77.5</b> | 67.8       | 69.3 | 72.3 | 71.3 | <b>71.3</b> |
| <i>HemoPI-3 dataset</i> |       |      |      |      |             |            |      |      |      |             |
| N descriptors           | 51    | 43   | 36   | 33   | <b>28</b>   | 51         | 43   | 36   | 33   | <b>28</b>   |
| GBC                     | 76.0  | 74.4 | 74.6 | 74.5 | <b>76.2</b> | 72.3       | 71.7 | 71.7 | 68.0 | <b>72.0</b> |

**Table S3.** Mean accuracies (%) of top performing Gradient Boosting Classifier for model/validation datasets (HemoPI-1, HemoPI-2, HemoPI-3) after reducing the number of features (N: physicochemical descriptors) using multicollinearity and correlation thresholds ranging from 0.75 to 0.95. Optimal correlation thresholds were selected using best overall model and validation accuracies (in bold).

| Classifier                            | Parameters                                                                          | N  | Acc. (%) | Prec. (%) | MCC   | CK    | AUC ROC |
|---------------------------------------|-------------------------------------------------------------------------------------|----|----------|-----------|-------|-------|---------|
| All 56 descriptors                    |                                                                                     |    |          |           |       |       |         |
| LOGREG                                | 'C': 1000, 'penalty': 'l2', 'solver': 'lbfgs', 'tol': 0.1                           | 56 | 94.9     | 92.6      | 0.898 | 0.898 | 0.949   |
|                                       |                                                                                     |    | 86.4     | 81.7      | 0.727 | 0.727 | 0.864   |
| RFC                                   | 'max_depth': 10, 'max_features': 'sqrt', 'min_samples_leaf': 4, 'n_estimators': 128 | 56 | 95.6     | 93.6      | 0.912 | 0.912 | 0.956   |
|                                       |                                                                                     |    | 88.6     | 84.6      | 0.773 | 0.773 | 0.886   |
| GBC                                   | 'max_depth': 4, 'max_features': 'sqrt', 'min_samples_leaf': 10, 'n_estimators': 208 | 56 | 96.0     | 94.6      | 0.921 | 0.921 | 0.960   |
|                                       |                                                                                     |    | 92.3     | 89.2      | 0.846 | 0.846 | 0.923   |
| LDA                                   | 'solver': 'svd', 'tol': 0.1                                                         | 56 | 94.7     | 91.8      | 0.894 | 0.783 | 0.947   |
|                                       |                                                                                     |    | 89.1     | 84.8      | 0.782 | 0.782 | 0.891   |
| SVC-RBF                               | 'C': 10, 'gamma': 0.1                                                               | 56 | 95.5     | 93.4      | 0.909 | 0.909 | 0.955   |
|                                       |                                                                                     |    | 90.9     | 87.2      | 0.818 | 0.818 | 0.909   |
| Multicollinearity (threshold = 0.75)  |                                                                                     |    |          |           |       |       |         |
| LOGREG                                | 'C': 1000, 'penalty': 'l2', 'solver': 'newton-cg', 'tol': 0.1                       | 26 | 94.0     | 91.2      | 0.880 | 0.880 | 0.940   |
|                                       |                                                                                     |    | 89.6     | 85.9      | 0.791 | 0.791 | 0.896   |
| RFC                                   | 'max_depth': 14, 'max_features': 'log2', 'min_samples_leaf': 2, 'n_estimators': 208 | 26 | 94.8     | 92.6      | 0.896 | 0.896 | 0.948   |
|                                       |                                                                                     |    | 89.1     | 85.1      | 0.782 | 0.782 | 0.891   |
| GBC                                   | 'max_depth': 4, 'max_features': 'sqrt', 'min_samples_leaf': 10, 'n_estimators': 240 | 26 | 96.5     | 95.0      | 0.930 | 0.930 | 0.965   |
|                                       |                                                                                     |    | 92.7     | 89.6      | 0.855 | 0.855 | 0.927   |
| LDA                                   | 'solver': 'svd', 'tol': 0.0001                                                      | 26 | 93.4     | 90.2      | 0.869 | 0.869 | 0.934   |
|                                       |                                                                                     |    | 90.0     | 85.7      | 0.800 | 0.800 | 0.900   |
| SVC-RBF                               | 'C': 1, 'gamma': 1                                                                  | 26 | 95.1     | 93.5      | 0.903 | 0.903 | 0.951   |
|                                       |                                                                                     |    | 87.3     | 82.0      | 0.746 | 0.746 | 0.873   |
| Recursive Feature Elimination (RFECV) |                                                                                     |    |          |           |       |       |         |
| RFC                                   | 'max_depth': 6, 'max_features': 'log2', 'min_samples_leaf': 4, 'n_estimators': 48   | 51 | 95.2     | 93.0      | 0.905 | 0.905 | 0.952   |
|                                       |                                                                                     |    | 90.9     | 87.2      | 0.818 | 0.818 | 0.909   |
| GBC                                   | 'max_depth': 16, 'max_features': 'sqrt', 'min_samples_leaf': 10, 'n_estimators': 32 | 25 | 95.1     | 92.6      | 0.903 | 0.903 | 0.951   |
|                                       |                                                                                     |    | 90.0     | 86.3      | 0.800 | 0.800 | 0.900   |
| LDA                                   | 'solver': 'svd', 'tol': 0.0001                                                      | 18 | 95.1     | 92.6      | 0.903 | 0.903 | 0.951   |
|                                       |                                                                                     |    | 94.6     | 92.5      | 0.891 | 0.891 | 0.946   |

**Table S4a.** Performance metrics of binary classifiers Logistic Regression (LOGREG), Random Forest (RFC), Gradient Boosting (GBC), Linear Discriminant Analysis (LDA) and Support Vector machine with radial basis function kernel (SVC-RBF) using HemoPI-1 model/validation datasets after optimizing their respective hyperparameters with full or reduced number of features (N: physicochemical descriptors).

| Classifier                            | Parameters                                                                          | N  | Acc. (%) | Prec. (%) | MCC   | CK    | AUC ROC |
|---------------------------------------|-------------------------------------------------------------------------------------|----|----------|-----------|-------|-------|---------|
| All 56 descriptors                    |                                                                                     |    |          |           |       |       |         |
| LOGREG                                | 'C': 1000, 'penalty': 'l2', 'solver': 'newton-cg', 'tol': 0.1                       | 56 | 70.7     | 67.5      | 0.406 | 0.405 | 0.701   |
|                                       |                                                                                     |    | 60.9     | 60.4      | 0.207 | 0.207 | 0.603   |
| RFC                                   | 'max_depth': 16, 'max_features': 'log2', 'min_samples_leaf': 2, 'n_estimators': 144 | 56 | 76.9     | 73.2      | 0.532 | 0.532 | 0.765   |
|                                       |                                                                                     |    | 69.8     | 66.1      | 0.389 | 0.380 | 0.686   |
| GBC                                   | 'max_depth': 4, 'max_features': 'sqrt', 'min_samples_leaf': 2, 'n_estimators': 112  | 56 | 77.7     | 74.0      | 0.549 | 0.549 | 0.774   |
|                                       |                                                                                     |    | 74.3     | 70.4      | 0.479 | 0.476 | 0.736   |
| LDA                                   | 'solver': 'svd', 'tol': 0.2                                                         | 56 | 68.5     | 65.5      | 0.360 | 0.356 | 0.676   |
|                                       |                                                                                     |    | 63.4     | 61.9      | 0.256 | 0.255 | 0.626   |
| SVC-RBF                               | 'C': 1000, 'gamma': 0.1                                                             | 56 | 77.7     | 74.2      | 0.550 | 0.550 | 0.774   |
|                                       |                                                                                     |    | 65.3     | 63.9      | 0.303 | 0.303 | 0.652   |
| Multicollinearity (threshold = 0.75)  |                                                                                     |    |          |           |       |       |         |
| LOGREG                                | 'C': 100, 'penalty': 'l2', 'solver': 'sag', 'tol': 0.1                              | 27 | 67.3     | 64.6      | 0.335 | 0.332 | 0.664   |
|                                       |                                                                                     |    | 61.9     | 61.0      | 0.226 | 0.225 | 0.612   |
| RFC                                   | 'max_depth': 18, 'max_features': 'log2', 'min_samples_leaf': 2, 'n_estimators': 48  | 27 | 76.7     | 73.1      | 0.530 | 0.530 | 0.764   |
|                                       |                                                                                     |    | 71.3     | 67.9      | 0.418 | 0.416 | 0.706   |
| GBC                                   | 'max_depth': 18, 'max_features': 'None', 'min_samples_leaf': 8, 'n_estimators': 80  | 27 | 78.6     | 74.9      | 0.567 | 0.567 | 0.783   |
|                                       |                                                                                     |    | 71.3     | 67.7      | 0.418 | 0.414 | 0.704   |
| LDA                                   | 'solver': 'svd', 'tol': 0.0001                                                      | 27 | 68.4     | 65.3      | 0.358 | 0.354 | 0.675   |
|                                       |                                                                                     |    | 63.4     | 62.0      | 0.257 | 0.256 | 0.627   |
| SVC-RBF                               | 'C': 1000, 'gamma': 1                                                               | 27 | 72.1     | 69.3      | 0.437 | 0.437 | 0.719   |
|                                       |                                                                                     |    | 69.8     | 67.3      | 0.391 | 0.391 | 0.695   |
| Recursive Feature Elimination (RFECV) |                                                                                     |    |          |           |       |       |         |
| RFC                                   | 'max_depth': 14, 'max_features': 'None', 'min_samples_leaf': 2, 'n_estimators': 128 | 27 | 77.8     | 74.1      | 0.552 | 0.552 | 0.775   |
|                                       |                                                                                     |    | 70.8     | 67.2      | 0.408 | 0.403 | 0.699   |
| GBC                                   | 'max_depth': 4, 'max_features': 'None', 'min_samples_leaf': 10, 'n_estimators': 128 | 54 | 77.7     | 73.9      | 0.549 | 0.549 | 0.773   |
|                                       |                                                                                     |    | 69.8     | 66.7      | 0.388 | 0.385 | 0.691   |
| LDA                                   | 'solver': 'svd', 'tol': 0.1                                                         | 48 | 69.6     | 66.3      | 0.383 | 0.379 | 0.687   |
|                                       |                                                                                     |    | 60.9     | 60.2      | 0.205 | 0.204 | 0.601   |

**Table S4b.** Performance metrics of binary classifiers Logistic Regression (LOGREG), Random Forest (RFC), Gradient Boosting (GBC) and Support Vector machine with radial basis function kernel (SVC-RBF) using HemoPI-2 model/validation datasets after optimizing their respective hyperparameters with full or reduced number of features (N: physicochemical descriptors).

| Classifier                            | Parameters                                                                           | N  | Acc. (%) | Prec. (%) | MCC   | CK    | AUC ROC |
|---------------------------------------|--------------------------------------------------------------------------------------|----|----------|-----------|-------|-------|---------|
| All 56 descriptors                    |                                                                                      |    |          |           |       |       |         |
| LOGREG                                | 'C': 1000, 'penalty': 'l2', 'solver': 'newton-cg', 'tol': 0.0001                     | 56 | 70.9     | 67.2      | 0.410 | 0.403 | 0.698   |
|                                       |                                                                                      |    | 70.8     | 67.5      | 0.408 | 0.406 | 0.701   |
| RFC                                   | 'max_depth': 20, 'max_features': 'log2', 'min_samples_leaf': 2, 'n_estimators': 176  | 56 | 78.0     | 74.0      | 0.554 | 0.553 | 0.775   |
|                                       |                                                                                      |    | 70.2     | 66.8      | 0.395 | 0.391 | 0.693   |
| GBC                                   | 'max_depth': 18, 'max_features': 'log2', 'min_samples_leaf': 10, 'n_estimators': 192 | 56 | 80.0     | 76.4      | 0.597 | 0.597 | 0.796   |
|                                       |                                                                                      |    | 71.7     | 68.3      | 0.427 | 0.425 | 0.711   |
| LDA                                   | 'solver': 'svd', 'tol': 0.0001                                                       | 56 | 70.8     | 66.9      | 0.410 | 0.399 | 0.696   |
|                                       |                                                                                      |    | 70.8     | 67.2      | 0.407 | 0.403 | 0.699   |
| SVC-RBF                               | 'C': 10, 'gamma': 0.1                                                                | 56 | 73.0     | 68.4      | 0.458 | 0.442 | 0.716   |
|                                       |                                                                                      |    | 72.0     | 68.0      | 0.434 | 0.426 | 0.710   |
| Multicollinearity (threshold = 0.75)  |                                                                                      |    |          |           |       |       |         |
| LOGREG                                | 'C': 1, 'penalty': 'l2', 'solver': 'newton-cg', 'tol': 0.2                           | 28 | 69.9     | 66.2      | 0.390 | 0.381 | 0.687   |
|                                       |                                                                                      |    | 70.8     | 67.1      | 0.408 | 0.402 | 0.698   |
| RFC                                   | 'max_depth': 12, 'max_features': 'sqrt', 'min_samples_leaf': 2, 'n_estimators': 96   | 28 | 76.4     | 72.6      | 0.523 | 0.521 | 0.759   |
|                                       |                                                                                      |    | 71.7     | 68.0      | 0.426 | 0.422 | 0.709   |
| GBC                                   | 'max_depth': 20, 'max_features': 'log2', 'min_samples_leaf': 8, 'n_estimators': 96   | 28 | 78.0     | 74.4      | 0.556 | 0.556 | 0.777   |
|                                       |                                                                                      |    | 72.6     | 69.0      | 0.445 | 0.443 | 0.719   |
| LDA                                   | 'solver': 'svd', 'tol': 0.2                                                          | 28 | 70.3     | 66.5      | 0.400 | 0.390 | 0.703   |
|                                       |                                                                                      |    | 75.4     | 70.9      | 0.503 | 0.497 | 0.745   |
| SVC-RBF                               | 'C': 10, 'gamma': 1                                                                  | 28 | 71.7     | 67.4      | 0.429 | 0.415 | 0.703   |
|                                       |                                                                                      |    | 72.0     | 67.9      | 0.434 | 0.426 | 0.709   |
| Recursive Feature Elimination (RFECV) |                                                                                      |    |          |           |       |       |         |
| RFC                                   | 'max_depth': 18, 'max_features': 'sqrt', 'min_samples_leaf': 2, 'n_estimators': 160  | 32 | 77.6     | 73.5      | 0.546 | 0.544 | 0.770   |
|                                       |                                                                                      |    | 72.0     | 68.3      | 0.433 | 0.429 | 0.712   |
| GBC                                   | 'max_depth': 12, 'max_features': 'sqrt', 'min_samples_leaf': 8, 'n_estimators': 160  | 40 | 78.2     | 74.4      | 0.559 | 0.558 | 0.777   |
|                                       |                                                                                      |    | 74.5     | 70.8      | 0.483 | 0.482 | 0.740   |
| LDA                                   | 'solver': 'svd', 'tol': 0.0001                                                       | 16 | 71.4     | 67.2      | 0.425 | 0.410 | 0.700   |
|                                       |                                                                                      |    | 72.0     | 67.9      | 0.434 | 0.426 | 0.709   |

**Table S4c.** Performance metrics of binary classifiers Logistic Regression (LOGREG), Random Forest (RFC), Gradient Boosting (GBC) and Support Vector machine with radial basis function kernel (SVC-RBF) using HemoPI-3 model/validation datasets after optimizing their respective hyperparameters with full or reduced number of features (N: physicochemical descriptors) using multicollinearity threshold of 0.75 and 10-fold cross-validation recursive feature elimination.

| Parameters                             | Feature Reduction | N  | Acc. (%) | Prec. (%) | MCC   | CK    | AUC ROC |
|----------------------------------------|-------------------|----|----------|-----------|-------|-------|---------|
| HemoPI-1 model and validation datasets |                   |    |          |           |       |       |         |
| default                                | none              | 56 | 94.8     | 92.4      | 0.896 | 0.896 | 0.948   |
|                                        |                   |    | 87.7     | 83.0      | 0.755 | 0.755 | 0.877   |
| default                                | MC (0.75)         | 26 | 95.7     | 93.7      | 0.914 | 0.914 | 0.957   |
|                                        |                   |    | 92.3     | 88.5      | 0.846 | 0.846 | 0.923   |
| default                                | RFECV             | 18 | 95.3     | 93.1      | 0.905 | 0.905 | 0.953   |
|                                        |                   |    | 89.1     | 84.8      | 0.782 | 0.782 | 0.891   |
| HemoPI-2 model and validation datasets |                   |    |          |           |       |       |         |
| default                                | none              | 56 | 76.1     | 72.3      | 0.517 | 0.517 | 0.756   |
|                                        |                   |    | 69.3     | 66.4      | 0.378 | 0.378 | 0.687   |
| default                                | MC (0.75)         | 27 | 76.1     | 72.4      | 0.517 | 0.516 | 0.757   |
|                                        |                   |    | 69.8     | 66.4      | 0.388 | 0.383 | 0.689   |
| default                                | RFECV             | 51 | 74.5     | 70.9      | 0.484 | 0.484 | 0.741   |
|                                        |                   |    | 69.3     | 66.6      | 0.379 | 0.378 | 0.688   |
| HemoPI-3 model and validation datasets |                   |    |          |           |       |       |         |
| default                                | none              | 56 | 74.7     | 71.1      | 0.487 | 0.486 | 0.741   |
|                                        |                   |    | 73.2     | 69.9      | 0.459 | 0.458 | 0.728   |
| default                                | MC (0.75)         | 28 | 75.0     | 71.4      | 0.495 | 0.494 | 0.746   |
|                                        |                   |    | 72.0     | 68.6      | 0.433 | 0.431 | 0.714   |
| default                                | RFECV             | 23 | 76.3     | 72.5      | 0.520 | 0.518 | 0.758   |
|                                        |                   |    | 72.3     | 69.1      | 0.440 | 0.439 | 0.719   |

**Table S5a.** Performance metrics of binary classifier Extreme Gradient Boosting for HemoPI datasets with full or reduced number of features (multicollinearity, recursive feature elimination) using default model hyperparameters.

| Parameters                                                                                                                                               | Feature Reduction | N  | Acc. (%) | Prec. (%) | MCC   | CK    | AUC ROC |
|----------------------------------------------------------------------------------------------------------------------------------------------------------|-------------------|----|----------|-----------|-------|-------|---------|
| HemoPI-1 model and validation datasets                                                                                                                   |                   |    |          |           |       |       |         |
| 'colsample_bytree': 0.9, 'eta': 0.1, 'max_depth': 10, 'min_child_weight': 1, 'subsample': 0.7, 'tree_method': 'hist', 'objective': 'binary:logistic'     | none              | 56 | 95.5     | 93.4      | 0.909 | 0.909 | 0.955   |
|                                                                                                                                                          |                   |    | 88.6     | 84.4      | 0.773 | 0.773 | 0.886   |
| 'colsample_bytree': 0.7, 'eta': 0.2, 'max_depth': 10, 'min_child_weight': 0.4, 'subsample': 0.7, 'tree_method': 'hist', 'objective': 'binary:logistic'   | MC (0.75)         | 26 | 95.5     | 93.8      | 0.910 | 0.910 | 0.955   |
|                                                                                                                                                          |                   |    | 91.4     | 88.3      | 0.828 | 0.827 | 0.914   |
| 'colsample_bytree': 0.8, 'eta': 0.1, 'max_depth': 10, 'min_child_weight': 1, 'subsample': 0.7, 'tree_method': 'hist', 'objective': 'binary:logistic'     | RFECV             | 24 | 95.4     | 93.3      | 0.907 | 0.907 | 0.954   |
|                                                                                                                                                          |                   |    | 90.5     | 86.7      | 0.809 | 0.809 | 0.905   |
| HemoPI-2 model and validation datasets                                                                                                                   |                   |    |          |           |       |       |         |
| 'colsample_bytree': 0.8, 'eta': 0.1, 'max_depth': 10, 'min_child_weight': 0.8, 'subsample': 0.7, 'tree_method': 'approx', 'objective': 'binary:logistic' | none              | 56 | 77.8     | 74.3      | 0.552 | 0.552 | 0.776   |
|                                                                                                                                                          |                   |    | 67.3     | 64.8      | 0.337 | 0.335 | 0.666   |
| 'colsample_bytree': 1.0, 'eta': 0.3, 'max_depth': 10, 'min_child_weight': 1, 'subsample': 0.9, 'tree_method': 'hist', 'objective': 'binary:logistic'     | MC (0.75)         | 27 | 77.5     | 73.8      | 0.545 | 0.545 | 0.771   |
|                                                                                                                                                          |                   |    | 69.8     | 66.8      | 0.388 | 0.386 | 0.691   |
| 'colsample_bytree': 0.8, 'eta': 0.1, 'max_depth': 14, 'min_child_weight': 1, 'subsample': 0.7, 'tree_method': 'hist', 'objective': 'binary:logistic'     | RFECV             | 34 | 79.1     | 75.3      | 0.577 | 0.577 | 0.787   |
|                                                                                                                                                          |                   |    | 70.3     | 67.2      | 0.398 | 0.397 | 0.697   |
| HemoPI-3 model and validation datasets                                                                                                                   |                   |    |          |           |       |       |         |
| 'colsample_bytree': 0.7, 'eta': 0.1, 'max_depth': 10, 'min_child_weight': 0.4, 'subsample': 0.7, 'tree_method': 'hist', 'objective': 'binary:logistic'   | none              | 56 | 78.3     | 74.6      | 0.561 | 0.560 | 0.779   |
|                                                                                                                                                          |                   |    | 70.8     | 67.5      | 0.408 | 0.406 | 0.701   |
| 'colsample_bytree': 0.8, 'eta': 0.2, 'max_depth': 14, 'min_child_weight': 0.2, 'subsample': 0.8, 'tree_method': 'approx', 'objective': 'binary:logistic' | MC (0.75)         | 28 | 78.7     | 74.9      | 0.569 | 0.568 | 0.783   |
|                                                                                                                                                          |                   |    | 72.6     | 69.1      | 0.445 | 0.444 | 0.720   |
| 'colsample_bytree': 0.8, 'eta': 0.1, 'max_depth': 10, 'min_child_weight': 0.4, 'subsample': 0.7, 'tree_method': 'hist', 'objective': 'binary:logistic'   | RFECV             | 21 | 78.2     | 74.3      | 0.559 | 0.558 | 0.777   |
|                                                                                                                                                          |                   |    | 70.2     | 67.6      | 0.398 | 0.398 | 0.699   |

**Table S5b.** Performance metrics of binary classifier Extreme Gradient Boosting for HemoPI datasets with full or reduced number of features (multicollinearity, recursive feature elimination) using optimized model hyperparameters.

| <b>Model datasets</b> | Nb. Peptides | Novelty | Inlier | Fraction |
|-----------------------|--------------|---------|--------|----------|
| HemoPI-1              | 884          | 47      | 837    | 0.05     |
| HemoPI-2              | 812          | 23      | 789    | 0.03     |
| HemoPI-3              | 1298         | 50      | 1248   | 0.04     |
| <b>APD datasets</b>   | Nb. Peptides | Outlier | Inlier | Fraction |
| APD / HemoPI-1        | 3081         | 337     | 2744   | 0.11     |
| APD / HemoPI-2        | 3081         | 440     | 2641   | 0.14     |
| APD / HemoPI-3        | 3081         | 89      | 2992   | 0.03     |
| <b>HAMP datasets</b>  | Nb. Peptides | Novelty | Inlier | Fraction |
| HAMP / HemoPI-1       | 317          | 16      | 301    | 0.05     |
| HAMP / HemoPI-2       | 317          | 52      | 265    | 0.16     |
| HAMP / HemoPI-3       | 317          | 4       | 313    | 0.01     |

**Table S6.** Inliers, novelties (model datasets) and outliers (APD and HAMP datasets) counts applying empirical rule to Mahalanobis distances for HemoPI-1, HemoPI-2, HemoPI-3 datasets.

| Outliers fraction | 0.05                 |             | 0.03                 |             | 0.04                 |             |
|-------------------|----------------------|-------------|----------------------|-------------|----------------------|-------------|
|                   | <b>HemoPI-1</b>      |             | <b>HemoPI-2</b>      |             | <b>HemoPI-3</b>      |             |
| Nb. peptides      | 884                  |             | 812                  |             | 1298                 |             |
| Detection method  | Novelty              | Inlier      | Novelty              | Inlier      | Novelty              | Inlier      |
| ABOD              | 63                   | 821         | 35                   | 777         | 70                   | 1228        |
| CBLOF             | 45                   | 839         | 25                   | 787         | 52                   | 1246        |
| FB                | 36                   | 848         | 21                   | 791         | 42                   | 1256        |
| HBOS              | 45                   | 839         | 25                   | 787         | 52                   | 1246        |
| IF                | 45                   | 839         | 25                   | 787         | 52                   | 1246        |
| KNN               | 31                   | 853         | 21                   | 791         | 40                   | 1258        |
| Average KNN       | <b>14</b>            | <b>870</b>  | <b>5</b>             | <b>807</b>  | <b>10</b>            | <b>1288</b> |
| LOF               | 31                   | 853         | 19                   | 793         | 42                   | 1256        |
|                   | <b>APD/HemoPI-1</b>  |             | <b>APD/HemoPI-2</b>  |             | <b>APD/HemoPI-3</b>  |             |
| Nb. peptides      | 3081                 |             | 3081                 |             | 3081                 |             |
| Detection method  | Outlier              | Inlier      | Outlier              | Inlier      | Outlier              | Inlier      |
| ABOD              | 337                  | 2744        | 376                  | 2705        | 309                  | 2772        |
| CBLOF             | 278                  | 2803        | 307                  | 2774        | 354                  | 2727        |
| FB                | 275                  | 2806        | 195                  | 2886        | 221                  | 2860        |
| HBOS              | 157                  | 2924        | 108                  | 2973        | 118                  | 2963        |
| IF                | 180                  | 2901        | 100                  | 2981        | 170                  | 2911        |
| KNN               | 262                  | 2819        | 205                  | 2876        | 222                  | 2859        |
| Average KNN       | <b>273</b>           | <b>2808</b> | <b>264</b>           | <b>2817</b> | <b>253</b>           | <b>2828</b> |
| LOF               | 267                  | 2814        | 210                  | 2871        | 452                  | 2629        |
|                   | <b>HAMP/HemoPI-1</b> |             | <b>HAMP/HemoPI-2</b> |             | <b>HAMP/HemoPI-3</b> |             |
| Nb. peptides      | 317                  |             | 317                  |             | 317                  |             |
| Detection method  | Novelty              | Inlier      | Novelty              | Inlier      | Novelty              | Inlier      |
| ABOD              | 4                    | 313         | 6                    | 311         | 7                    | 310         |
| CBLOF             | 13                   | 304         | 13                   | 304         | 38                   | 279         |
| FB                | 3                    | 314         | 1                    | 316         | 3                    | 314         |
| HBOS              | 7                    | 310         | 0                    | 317         | 3                    | 314         |
| IF                | 4                    | 313         | 0                    | 317         | 7                    | 310         |
| KNN               | 5                    | 312         | 1                    | 316         | 3                    | 314         |
| Average KNN       | <b>3</b>             | <b>314</b>  | <b>3</b>             | <b>314</b>  | <b>3</b>             | <b>314</b>  |
| LOF               | 4                    | 313         | 2                    | 315         | 12                   | 305         |

**Table S7.** Inliers, novelties and outliers counts applying multivariate outlier detection methods; ABOD: Angle-based outlier detection, CBLOF: Cluster-based local outlier factor, FB: Feature bagging, HBOS: Histogram-based outlier detection, IF: Isolation forest, (Average) KNN: K-nearest neighbors detector, LOF: Local outlier factor to 56-dimensional datasets HemoPI-1, HemoPI-2, HemoPI-3, Antimicrobial Peptide Dataset (APD, 3081) and known haemolytic antimicrobial peptides in APD (HAMP, 317). – not reported.



|    | Physicochemical property | Test               | p-value                | p-adjust               |
|----|--------------------------|--------------------|------------------------|------------------------|
| 1  | H_Eisenberg              | Welch              | $4.29 \times 10^{-6}$  | $5.34 \times 10^{-6}$  |
| 2  | uH_Eisenberg             | Wilcoxon           | $5.39 \times 10^{-13}$ | $1.59 \times 10^{-12}$ |
| 3  | modlas_ABHPRK            | Wilcoxon           | $8.18 \times 10^{-1}$  | $8.18 \times 10^{-1}$  |
| 4  | uB_Bulkiness             | Wilcoxon           | $1.95 \times 10^{-3}$  | $2.02 \times 10^{-3}$  |
| 5  | uH_HoppWoods             | Wilcoxon           | $3.87 \times 10^{-12}$ | $9.02 \times 10^{-12}$ |
| 6  | u_polarity               | Wilcoxon           | $1.74 \times 10^{-9}$  | $2.86 \times 10^{-9}$  |
| 7  | H_GRAVY                  | Kolmogorov-Smirnov | 0.00                   | 0.00                   |
| 8  | uH_GRAVY                 | Kolmogorov-Smirnov | $1.67 \times 10^{-13}$ | $5.19 \times 10^{-13}$ |
| 9  | Z3_1                     | Kolmogorov-Smirnov | $5.21 \times 10^{-10}$ | $9.42 \times 10^{-10}$ |
| 10 | Z3_2                     | Kolmogorov-Smirnov | $1.31 \times 10^{-12}$ | $3.40 \times 10^{-12}$ |
| 11 | Z3_3                     | Kolmogorov-Smirnov | $4.93 \times 10^{-8}$  | $6.90 \times 10^{-8}$  |
| 12 | Z5_1                     | Kolmogorov-Smirnov | $1.93 \times 10^{-4}$  | $2.19 \times 10^{-4}$  |
| 13 | Z5_2                     | Kolmogorov-Smirnov | $1.11 \times 10^{-16}$ | $6.22 \times 10^{-16}$ |
| 14 | Z5_3                     | Kolmogorov-Smirnov | $1.13 \times 10^{-11}$ | $2.35 \times 10^{-11}$ |
| 15 | Z5_4                     | Kolmogorov-Smirnov | $4.07 \times 10^{-9}$  | $6.16 \times 10^{-9}$  |
| 16 | Z5_5                     | Kolmogorov-Smirnov | $3.86 \times 10^{-2}$  | $3.93 \times 10^{-2}$  |
| 17 | S_AASI                   | Kolmogorov-Smirnov | $1.31 \times 10^{-7}$  | $1.70 \times 10^{-7}$  |
| 18 | uS_AASI                  | Kolmogorov-Smirnov | $2.87 \times 10^{-9}$  | $4.59 \times 10^{-9}$  |
| 19 | H_argos                  | Kolmogorov-Smirnov | 0.00                   | 0.00                   |
| 20 | uH_argos                 | Kolmogorov-Smirnov | 0.00                   | 0.00                   |
| 21 | B_Bulkiness              | Kolmogorov-Smirnov | $2.05 \times 10^{-14}$ | $7.67 \times 10^{-14}$ |
| 22 | charge_phys              | Kolmogorov-Smirnov | $3.35 \times 10^{-12}$ | $8.17 \times 10^{-12}$ |
| 23 | charge_acid              | Kolmogorov-Smirnov | $3.06 \times 10^{-10}$ | $5.92 \times 10^{-10}$ |
| 24 | Ez                       | Kolmogorov-Smirnov | $1.96 \times 10^{-4}$  | $2.19 \times 10^{-4}$  |
| 25 | flexibility              | Kolmogorov-Smirnov | 0.00                   | 0.00                   |
| 26 | u_flexibility            | Kolmogorov-Smirnov | $1.03 \times 10^{-7}$  | $1.38 \times 10^{-7}$  |
| 27 | Grantham                 | Kolmogorov-Smirnov | $7.57 \times 10^{-12}$ | $1.63 \times 10^{-11}$ |
| 28 | H_HoppWoods              | Kolmogorov-Smirnov | $1.18 \times 10^{-4}$  | $1.41 \times 10^{-4}$  |
| 29 | ISAECI                   | Kolmogorov-Smirnov | $5.95 \times 10^{-14}$ | $2.08 \times 10^{-13}$ |
| 30 | H_Janin                  | Kolmogorov-Smirnov | $1.33 \times 10^{-5}$  | $1.61 \times 10^{-5}$  |
| 31 | uH_Janin                 | Kolmogorov-Smirnov | $1.78 \times 10^{-15}$ | $7.65 \times 10^{-15}$ |
| 32 | H_KyteDoolittle          | Kolmogorov-Smirnov | 0.00                   | 0.00                   |
| 33 | uH_KyteDoolittle         | Kolmogorov-Smirnov | $1.34 \times 10^{-12}$ | $3.40 \times 10^{-12}$ |
| 34 | F_Levitt                 | Kolmogorov-Smirnov | 0.00                   | 0.00                   |
| 35 | uF_Levitt                | Kolmogorov-Smirnov | $4.97 \times 10^{-4}$  | $5.35 \times 10^{-4}$  |
| 36 | MSS_shape                | Kolmogorov-Smirnov | $3.74 \times 10^{-8}$  | $5.38 \times 10^{-8}$  |
| 37 | u_MSS_shape              | Kolmogorov-Smirnov | $2.17 \times 10^{-4}$  | $2.39 \times 10^{-4}$  |
| 38 | MSW                      | Kolmogorov-Smirnov | $3.78 \times 10^{-7}$  | $4.82 \times 10^{-7}$  |
| 39 | pepArc                   | Kolmogorov-Smirnov | $3.18 \times 10^{-10}$ | $5.93 \times 10^{-10}$ |
| 40 | pepcats                  | Kolmogorov-Smirnov | $1.21 \times 10^{-4}$  | $1.41 \times 10^{-4}$  |
| 41 | polarity                 | Kolmogorov-Smirnov | $1.57 \times 10^{-10}$ | $3.15 \times 10^{-10}$ |
| 42 | PPCALI                   | Kolmogorov-Smirnov | $9.68 \times 10^{-10}$ | $1.64 \times 10^{-9}$  |
| 43 | refractivity             | Kolmogorov-Smirnov | $4.51 \times 10^{-9}$  | $6.64 \times 10^{-9}$  |
| 44 | u_refractivity           | Kolmogorov-Smirnov | $6.14 \times 10^{-4}$  | $6.48 \times 10^{-4}$  |
| 45 | t_scale                  | Kolmogorov-Smirnov | $5.55 \times 10^{-16}$ | $2.83 \times 10^{-15}$ |
| 46 | TM_tend                  | Kolmogorov-Smirnov | $4.04 \times 10^{-9}$  | $6.16 \times 10^{-9}$  |

**Table S9.** Statistical values (p-value and p-adjust) for all 56 physicochemical properties.

|    | <b>Physicochemical property</b> | <b>Test</b>        | <b>p-value</b>        | <b>p-adjust</b>       |
|----|---------------------------------|--------------------|-----------------------|-----------------------|
| 47 | u_TM_tend                       | Kolmogorov-Smirnov | 6.77×10 <sup>-6</sup> | 2.71×10 <sup>-6</sup> |
| 48 | Length                          | Kolmogorov-Smirnov | 0.00                  | 0.00                  |
| 49 | BomanIndex                      | Kolmogorov-Smirnov | 7.13×10 <sup>-6</sup> | 2.35×10 <sup>-6</sup> |
| 50 | Aromaticity                     | Kolmogorov-Smirnov | 5.44×10 <sup>-6</sup> | 7.42×10 <sup>-6</sup> |
| 51 | AliphaticIndex                  | Kolmogorov-Smirnov | 0.00                  | 0.00                  |
| 52 | InstabilityIndex                | Kolmogorov-Smirnov | 7.43×10 <sup>-6</sup> | 2.08×10 <sup>-6</sup> |
| 53 | NetCharge                       | Kolmogorov-Smirnov | 6.08×10 <sup>-6</sup> | 1.36×10 <sup>-6</sup> |
| 54 | MW                              | Kolmogorov-Smirnov | 1.11×10 <sup>-6</sup> | 5.18×10 <sup>-6</sup> |
| 55 | IsoelectricPoint                | Kolmogorov-Smirnov | 6.10×10 <sup>-6</sup> | 1.07×10 <sup>-6</sup> |
| 56 | HydrophobicRatio                | Kolmogorov-Smirnov | 0.00                  | 0.00                  |

**Table S9 (suite).** Statistical values (p-value and p-adjust) for all 56 physicochemical properties.

| Physicochemical property | APD inliers (2,808) |                          |        |       |                          |         |
|--------------------------|---------------------|--------------------------|--------|-------|--------------------------|---------|
|                          | minimum             | 1 <sup>st</sup> quartile | median | mean  | 3 <sup>rd</sup> quartile | maximum |
| H_Eisenberg              | -1.12               | -0.31                    | -0.01  | -0.02 | 0.28                     | 1.02    |
| uH_Eisenberg             | 0.00                | 0.07                     | 0.14   | 0.21  | 0.29                     | 1.15    |
| modlas_ABHPRK            | -3.50               | -1.14                    | -0.60  | -0.45 | 0.29                     | 2.93    |
| uB_Bulkiness             | 0.00                | 0.19                     | 0.43   | 0.60  | 0.83                     | 2.80    |
| uH_HoppWoods             | 1.58                | 5.87                     | 7.34   | 8.02  | 9.07                     | 18.28   |
| u_polarity               | 0.61                | 3.96                     | 6.25   | 7.18  | 8.68                     | 21.74   |
| H_GRAVY                  | 0.30                | 1.64                     | 3.32   | 3.50  | 5.11                     | 10.01   |
| uH_GRAVY                 | 1.80                | 6.27                     | 7.57   | 8.09  | 9.18                     | 16.16   |
| Z3_1                     | 0.71                | 3.62                     | 5.11   | 5.60  | 6.95                     | 13.04   |
| Z3_2                     | 0.11                | 1.67                     | 3.00   | 3.28  | 4.44                     | 9.34    |
| Z3_3                     | 0.26                | 1.35                     | 2.01   | 2.42  | 2.83                     | 9.64    |
| Z5_1                     | 0.09                | 0.69                     | 1.02   | 1.18  | 1.64                     | 3.24    |
| Z5_2                     | 0.93                | 1.95                     | 2.13   | 2.07  | 2.26                     | 3.13    |
| Z5_3                     | 0.00                | 0.05                     | 0.10   | 0.18  | 0.26                     | 1.66    |
| Z5_4                     | 0.00                | 0.00                     | 1.00   | 0.63  | 1.00                     | 2.00    |
| Z5_5                     | -1.00               | -0.27                    | -0.10  | -0.04 | 0.11                     | 1.49    |
| S_AASI                   | 0.00                | 0.07                     | 0.11   | 0.19  | 0.21                     | 1.32    |
| uS_AASI                  | 0.19                | 0.51                     | 0.60   | 0.59  | 0.70                     | 0.91    |
| H_argos                  | 0.00                | 0.03                     | 0.05   | 0.07  | 0.10                     | 0.58    |
| uH_argos                 | -1.00               | 0.00                     | 0.07   | 0.08  | 0.19                     | 0.58    |
| B_Bulkiness              | -1.00               | 0.00                     | 0.10   | 0.11  | 0.21                     | 0.62    |
| charge_phys              | 15.97               | 18.75                    | 19.55  | 19.67 | 20.50                    | 24.42   |
| charge_acid              | 0.15                | 0.54                     | 0.62   | 0.62  | 0.72                     | 0.89    |
| Ez                       | 0.00                | 0.03                     | 0.05   | 0.08  | 0.11                     | 0.42    |
| flexibility              | 33.03               | 69.71                    | 81.68  | 82.89 | 92.64                    | 153.10  |
| u_flexibility            | -2.05               | -0.43                    | -0.08  | -0.05 | 0.27                     | 3.00    |
| Grantham                 | 0.00                | 0.12                     | 0.25   | 0.37  | 0.48                     | 1.88    |
| H_HoppWoods              | 19.71               | 69.12                    | 79.62  | 82.81 | 97.93                    | 147.91  |
| ISAECI                   | -1.07               | -0.24                    | 0.02   | 0.00  | 0.32                     | 0.89    |
| H_Janin                  | 0.00                | 0.07                     | 0.14   | 0.19  | 0.28                     | 0.91    |
| uH_Janin                 | -1.00               | -0.21                    | -0.03  | 0.02  | 0.27                     | 1.15    |
| H_KyteDoolittle          | 0.00                | 0.06                     | 0.14   | 0.20  | 0.27                     | 0.93    |
| uH_KyteDoolittle         | 0.62                | 0.85                     | 0.96   | 0.94  | 1.02                     | 1.37    |
| F_Levitt                 | 0.00                | 0.03                     | 0.05   | 0.08  | 0.12                     | 0.88    |
| uF_Levitt                | 6.35                | 15.87                    | 18.70  | 17.54 | 19.82                    | 23.13   |
| MSS_shape                | 0.00                | 0.63                     | 1.16   | 1.78  | 2.45                     | 14.21   |
| u_MSS_shape              | -1.85               | -0.51                    | -0.25  | -0.24 | -0.02                    | 1.25    |
| MSW                      | 0.00                | 0.00                     | 1.00   | 0.65  | 1.00                     | 2.00    |
| pepArc                   | 0.00                | 1.00                     | 1.00   | 1.29  | 2.00                     | 3.00    |
| pepcats                  | 0.08                | 0.35                     | 0.42   | 0.42  | 0.48                     | 1.00    |
| polarity                 | 0.00                | 0.03                     | 0.05   | 0.07  | 0.10                     | 0.46    |
| PPCALI                   | -5.28               | -1.76                    | -0.83  | -0.73 | 0.01                     | 3.57    |
| refractivity             | 0.14                | 0.30                     | 0.39   | 0.39  | 0.46                     | 0.79    |
| u_refractivity           | 0.00                | 0.02                     | 0.04   | 0.05  | 0.08                     | 0.40    |
| t_scale                  | -37.03              | -15.92                   | -8.54  | -8.40 | -2.90                    | 26.86   |
| TM_tend                  | -3.27               | -0.86                    | -0.50  | -0.47 | -0.05                    | 1.50    |

**Table S10.** Descriptive statistics for 56 physicochemical property distributions (APD inliers).

| Physicochemical property | APD inliers (2,808) |                          |         |         |                          |          |
|--------------------------|---------------------|--------------------------|---------|---------|--------------------------|----------|
|                          | minimum             | 1 <sup>st</sup> quartile | median  | mean    | 3 <sup>rd</sup> quartile | maximum  |
| u_TM_tend                | 0.00                | 0.12                     | 0.23    | 0.35    | 0.47                     | 1.84     |
| Length                   | 2.00                | 10.00                    | 22.00   | 44.34   | 63.75                    | 183.00   |
| BomanIndex               | -3.82               | 0.17                     | 1.56    | 1.65    | 2.82                     | 8.72     |
| Aromaticity              | 0.00                | 0.00                     | 0.08    | 0.11    | 0.17                     | 0.50     |
| AliphaticIndex           | 0.00                | 21.14                    | 51.70   | 65.53   | 83.04                    | 292.50   |
| InstabilityIndex         | -43.43              | 15.01                    | 38.06   | 47.96   | 67.51                    | 295.57   |
| NetCharge                | -8.97               | -0.01                    | 1.99    | 3.35    | 5.96                     | 29.99    |
| MW                       | 260.29              | 1243.64                  | 2378.53 | 4760.15 | 6638.02                  | 19719.83 |
| IsoelectricPoint         | 2.43                | 6.00                     | 8.90    | 8.66    | 10.98                    | 13.53    |
| HydrophobicRatio         | 0.00                | 0.17                     | 0.30    | 0.31    | 0.42                     | 0.88     |

**Table S10 (suite).** Descriptive statistics for 56 physicochemical property distributions (inliers).

| Physicochemical property | APD outliers (273) |                          |        |       |                          |         |
|--------------------------|--------------------|--------------------------|--------|-------|--------------------------|---------|
|                          | minimum            | 1 <sup>st</sup> quartile | median | mean  | 3 <sup>rd</sup> quartile | maximum |
| H_Eisenberg              | -0.89              | -0.08                    | 0.11   | 0.10  | 0.29                     | 0.84    |
| uH_Eisenberg             | 0.00               | 0.13                     | 0.23   | 0.26  | 0.37                     | 0.94    |
| modlas_ABHPRK            | -2.66              | -0.40                    | 0.14   | 0.15  | 0.68                     | 2.17    |
| uB_Bulkiness             | 0.01               | 0.38                     | 0.71   | 0.82  | 1.21                     | 2.44    |
| uH_HoppWoods             | 2.96               | 7.06                     | 8.25   | 8.49  | 9.69                     | 14.75   |
| u_polarity               | 1.39               | 4.30                     | 5.48   | 5.55  | 6.69                     | 14.32   |
| H_GRAVY                  | 0.47               | 2.39                     | 3.44   | 3.54  | 4.61                     | 10.12   |
| uH_GRAVY                 | 2.81               | 6.82                     | 7.74   | 7.96  | 8.88                     | 13.76   |
| Z3_1                     | 1.42               | 3.84                     | 4.54   | 4.59  | 5.36                     | 9.35    |
| Z3_2                     | 0.81               | 2.32                     | 3.11   | 3.27  | 4.08                     | 8.98    |
| Z3_3                     | 0.47               | 1.31                     | 1.76   | 1.85  | 2.27                     | 6.59    |
| Z5_1                     | 0.14               | 0.67                     | 0.99   | 1.12  | 1.55                     | 3.15    |
| Z5_2                     | 1.47               | 2.00                     | 2.11   | 2.09  | 2.20                     | 2.67    |
| Z5_3                     | 0.00               | 0.07                     | 0.12   | 0.13  | 0.17                     | 0.55    |
| Z5_4                     | 0.00               | 0.00                     | 1.00   | 0.63  | 1.00                     | 1.00    |
| Z5_5                     | -0.66              | -0.08                    | 0.07   | 0.12  | 0.28                     | 1.23    |
| S_AASI                   | 0.01               | 0.11                     | 0.22   | 0.27  | 0.41                     | 1.05    |
| uS_AASI                  | 0.41               | 0.58                     | 0.62   | 0.63  | 0.67                     | 0.86    |
| H_argos                  | 0.00               | 0.03                     | 0.06   | 0.08  | 0.10                     | 0.30    |
| uH_argos                 | -0.27              | 0.05                     | 0.10   | 0.11  | 0.16                     | 0.60    |
| B_Bulkiness              | -0.27              | 0.07                     | 0.12   | 0.13  | 0.17                     | 0.60    |
| charge_phys              | 16.31              | 19.11                    | 19.62  | 19.71 | 20.19                    | 23.41   |
| charge_acid              | 0.36               | 0.53                     | 0.57   | 0.57  | 0.61                     | 0.86    |
| Ez                       | 0.00               | 0.04                     | 0.07   | 0.07  | 0.10                     | 0.25    |
| flexibility              | 50.46              | 78.96                    | 84.62  | 85.48 | 91.13                    | 132.55  |
| u_flexibility            | -1.37              | -0.41                    | -0.14  | -0.15 | 0.10                     | 1.40    |
| Grantham                 | 0.00               | 0.22                     | 0.40   | 0.44  | 0.63                     | 1.58    |
| H_HoppWoods              | 51.79              | 79.25                    | 85.95  | 88.70 | 97.05                    | 138.16  |
| ISAECI                   | -1.29              | -0.09                    | 0.06   | 0.06  | 0.25                     | 0.69    |
| H_Janin                  | 0.00               | 0.13                     | 0.24   | 0.26  | 0.38                     | 1.04    |
| uH_Janin                 | -0.72              | 0.04                     | 0.22   | 0.22  | 0.40                     | 0.89    |
| H_KyteDoolittle          | 0.01               | 0.13                     | 0.24   | 0.27  | 0.40                     | 0.79    |
| uH_KyteDoolittle         | 0.79               | 0.97                     | 1.01   | 1.01  | 1.05                     | 1.24    |
| F_Levitt                 | 0.00               | 0.03                     | 0.05   | 0.07  | 0.09                     | 0.27    |
| uF_Levitt                | 13.01              | 17.31                    | 18.35  | 18.18 | 19.20                    | 22.09   |
| MSS_shape                | 0.02               | 0.72                     | 1.19   | 1.41  | 1.84                     | 5.71    |
| u_MSS_shape              | -0.88              | -0.48                    | -0.34  | -0.31 | -0.18                    | 0.75    |
| MSW                      | 0.00               | 1.00                     | 1.00   | 0.86  | 1.00                     | 1.00    |
| pepArc                   | 0.00               | 1.00                     | 1.00   | 1.21  | 1.00                     | 2.00    |
| pepcats                  | 0.18               | 0.35                     | 0.40   | 0.39  | 0.44                     | 0.64    |
| polarity                 | 0.00               | 0.04                     | 0.07   | 0.08  | 0.12                     | 0.25    |
| PPCALI                   | -3.38              | -1.00                    | -0.36  | -0.38 | 0.25                     | 3.18    |
| refractivity             | 0.20               | 0.34                     | 0.39   | 0.39  | 0.43                     | 0.67    |
| u_refractivity           | 0.00               | 0.02                     | 0.04   | 0.05  | 0.06                     | 0.21    |
| t_scale                  | -23.68             | -10.24                   | -7.58  | -7.39 | -4.70                    | 9.34    |
| TM_tend                  | -1.78              | -0.58                    | -0.34  | -0.30 | -0.04                    | 1.02    |

**Table S11.** Descriptive statistics for 56 physicochemical property distributions (APD outliers).

| Physicochemical property | APD outliers (273) |                          |         |         |                          |          |
|--------------------------|--------------------|--------------------------|---------|---------|--------------------------|----------|
|                          | minimum            | 1 <sup>st</sup> quartile | median  | mean    | 3 <sup>rd</sup> quartile | maximum  |
| u_TM_tend                | 0.01               | 0.22                     | 0.41    | 0.48    | 0.70                     | 1.69     |
| Length                   | 7.00               | 21.00                    | 29.00   | 31.82   | 38.00                    | 131.00   |
| BomanIndex               | -3.13              | -0.22                    | 0.73    | 0.78    | 1.78                     | 6.39     |
| Aromaticity              | 0.00               | 0.04                     | 0.08    | 0.08    | 0.12                     | 0.39     |
| AliphaticIndex           | 0.00               | 57.78                    | 91.52   | 93.33   | 122.00                   | 240.00   |
| InstabilityIndex         | -38.59             | 8.76                     | 24.12   | 26.98   | 41.52                    | 165.30   |
| NetCharge                | -11.85             | 0.99                     | 2.68    | 2.95    | 4.68                     | 19.02    |
| MW                       | 763.82             | 2206.64                  | 3052.54 | 3476.07 | 4200.31                  | 14700.56 |
| IsoelectricPoint         | 2.65               | 8.34                     | 10.03   | 9.43    | 10.71                    | 13.06    |
| HydrophobicRatio         | 0.03               | 0.35                     | 0.43    | 0.44    | 0.52                     | 0.75     |

**Table S11 (suite).** Descriptive statistics for 56 physicochemical property distributions (outliers).

| Amino acid properties |                   | RPS inliers                   |                               | RPS outliers                  |
|-----------------------|-------------------|-------------------------------|-------------------------------|-------------------------------|
|                       |                   | Quadrant 1<br>% (mean, stdev) | Quadrant 4<br>% (mean, stdev) | Quadrant 5<br>% (mean, stdev) |
| charged               | K / R / H         | 15.1 ± 4.3                    | <b>23.8 ± 5.1</b>             | 16.9 ± 9.1                    |
|                       | D / E             | <b>6.5 ± 3.2</b>              | 2.5 ± 2.6                     | 3.4 ± 3.8                     |
| small                 | G / P             | 12.2 ± 4.7                    | 12.1 ± 5.2                    | <b>19.3 ± 7.5</b>             |
|                       | G / C / A / P / S | 29.6 ± 6.0                    | 30.4 ± 7.2                    | <b>42.3 ± 9.1</b>             |
| bulky                 | L / I             | <b>19.9 ± 5.9</b>             | 18.4 ± 6.6                    | 15.6 ± 7.8                    |
|                       | F / W / Y         | <b>10.4 ± 4.9</b>             | 10.2 ± 5.1                    | 6.9 ± 5.2                     |
|                       | F / L / I / W / Y | <b>30.4 ± 6.0</b>             | 28.6 ± 6.9                    | 22.5 ± 7.5                    |
| Global percentage     |                   | 81.6 ± 17.5                   | 85.3 ± 10.4                   | 85.1 ± 14.8                   |

**Table S12.** Amino acid composition for specific random peptide sequences (RPS), expressed in percentages (means, stdev: standard deviation).

| Amino acid properties |                   | APD (3,081)<br>% (mean, stdev) | RPS (5,000)<br>% (mean, stdev) |
|-----------------------|-------------------|--------------------------------|--------------------------------|
| charged               | K / R / H         | 17.4 ± 9.4                     | 17.9 ± 7.1                     |
|                       | D / E             | 4.5 ± 5.9                      | 4.1 ± 3.7                      |
| small                 | G / P             | 15.7 ± 9.4                     | 15.0 ± 6.6                     |
|                       | G / C / A / P / S | 35.7 ± 12.2                    | 34.9 ± 9.0                     |
| bulky                 | L / I             | 16.9 ± 11.5                    | 18.1 ± 7.2                     |
|                       | F / W / Y         | 8.5 ± 6.6                      | 8.9 ± 5.3                      |
|                       | F / L / I / W / Y | 25.5 ± 12.1                    | 27.1 ± 8.3                     |
| Global percentage     |                   | 83.1 ± 19.8                    | 84.0 ± 14.0                    |

**Table S13.** Amino acid compositions for APD and RPS datasets, expressed in percentages (means, stdev: standard deviation).





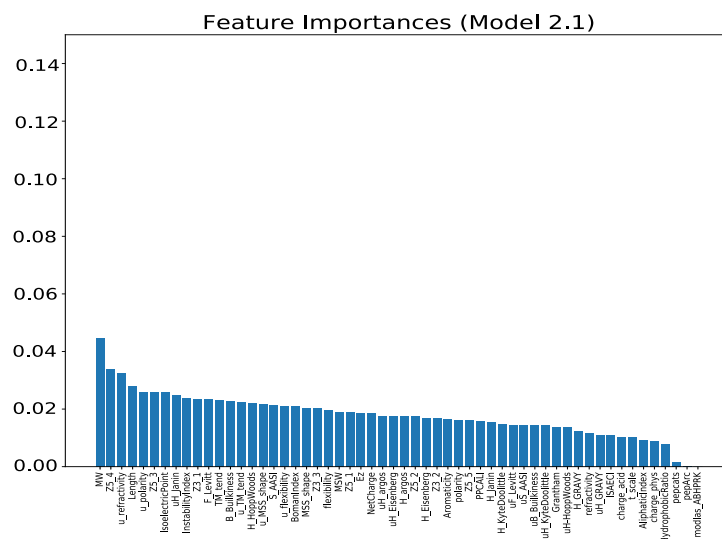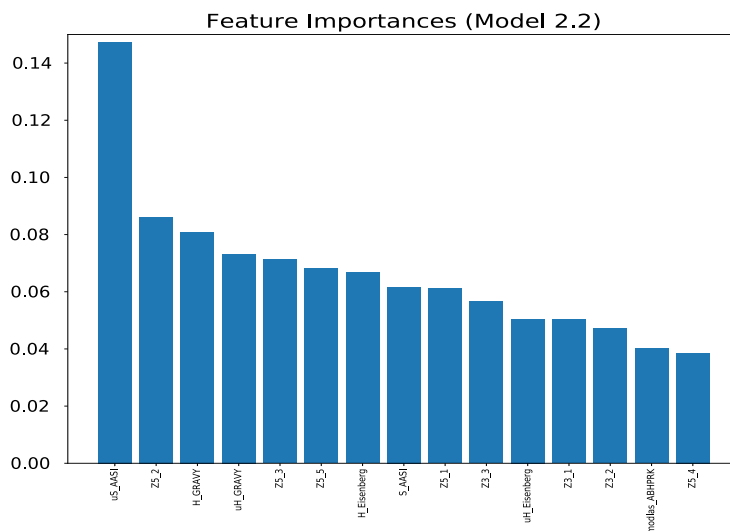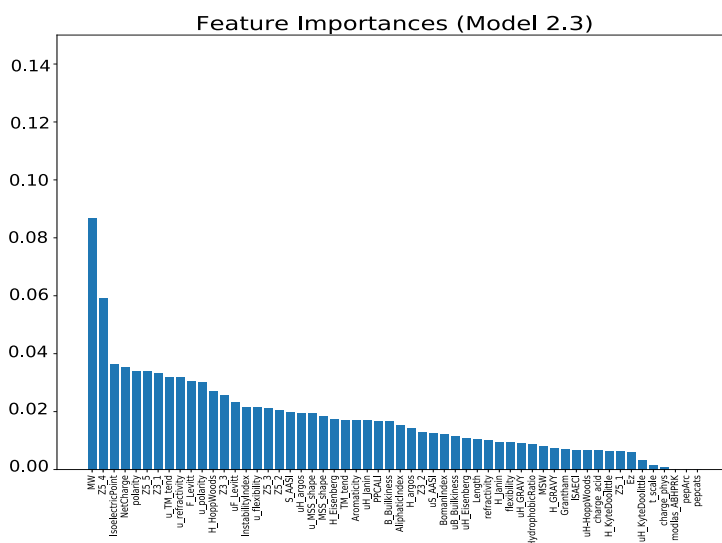

**Figure S1b.** Feature importances of top 3 binary classifiers for HemoPI-2 dataset.



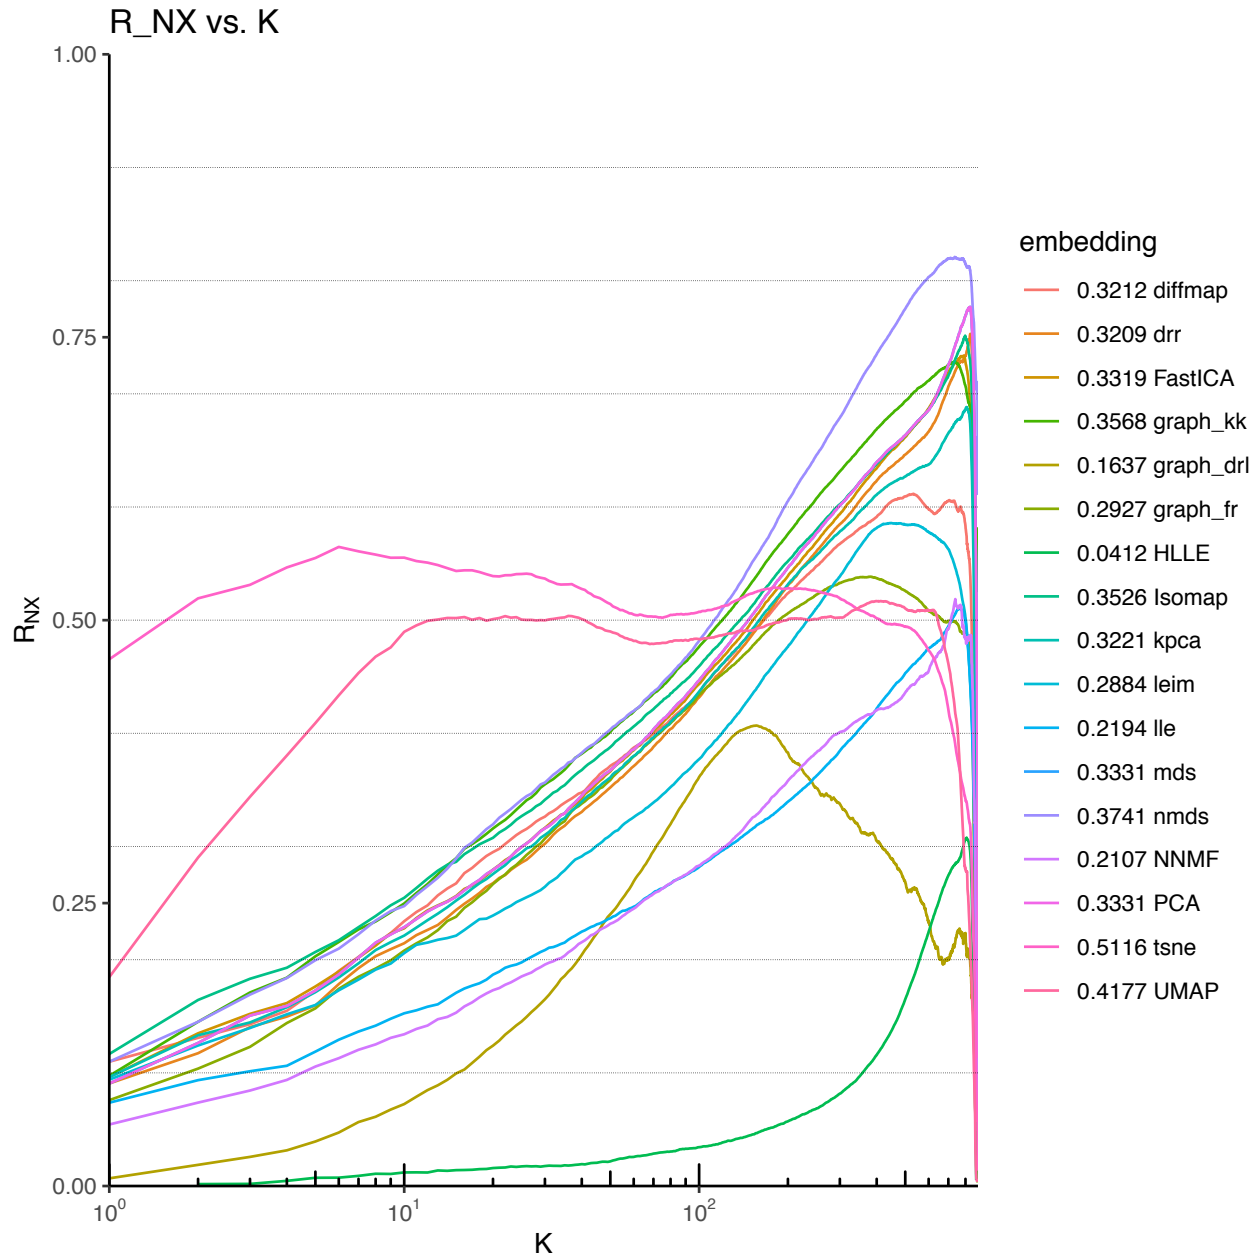

**Figure S2.** Quality curves  $R_{NX}(K)$  report the relative improvement over 17 different embedding techniques for HemoPI-1 model dataset. The higher the curve, the better AUCs stand in the legend. Embeddings are: diffmap (Diffusion maps), drr (Dimensionality reduction via regression), FastICA (Independent Component Analysis), graph\_kk (Graph embedding via Kamada Kawai algorithm), graph\_drl (Distributed recursive graph layout), graph\_fr (Fruchterman Reingold graph layout), HLLC (Hessian Locally Linear Embedding), Isomap (Isomap embedding), kPCA (kernel Principal Component Analysis), LEIM (Laplacian Eigenmaps), LLE (Locally Linear Embedding), MDS (Multidimensional Scaling), NMDS (Non-metric Multidimensional Scaling), NNMF (Non-Negative Matrix Factorization), PCA (Principal Component Analysis), t-SNE (t-distributed stochastic neighbour embedding) and UMAP (Uniform Manifold Approximation).

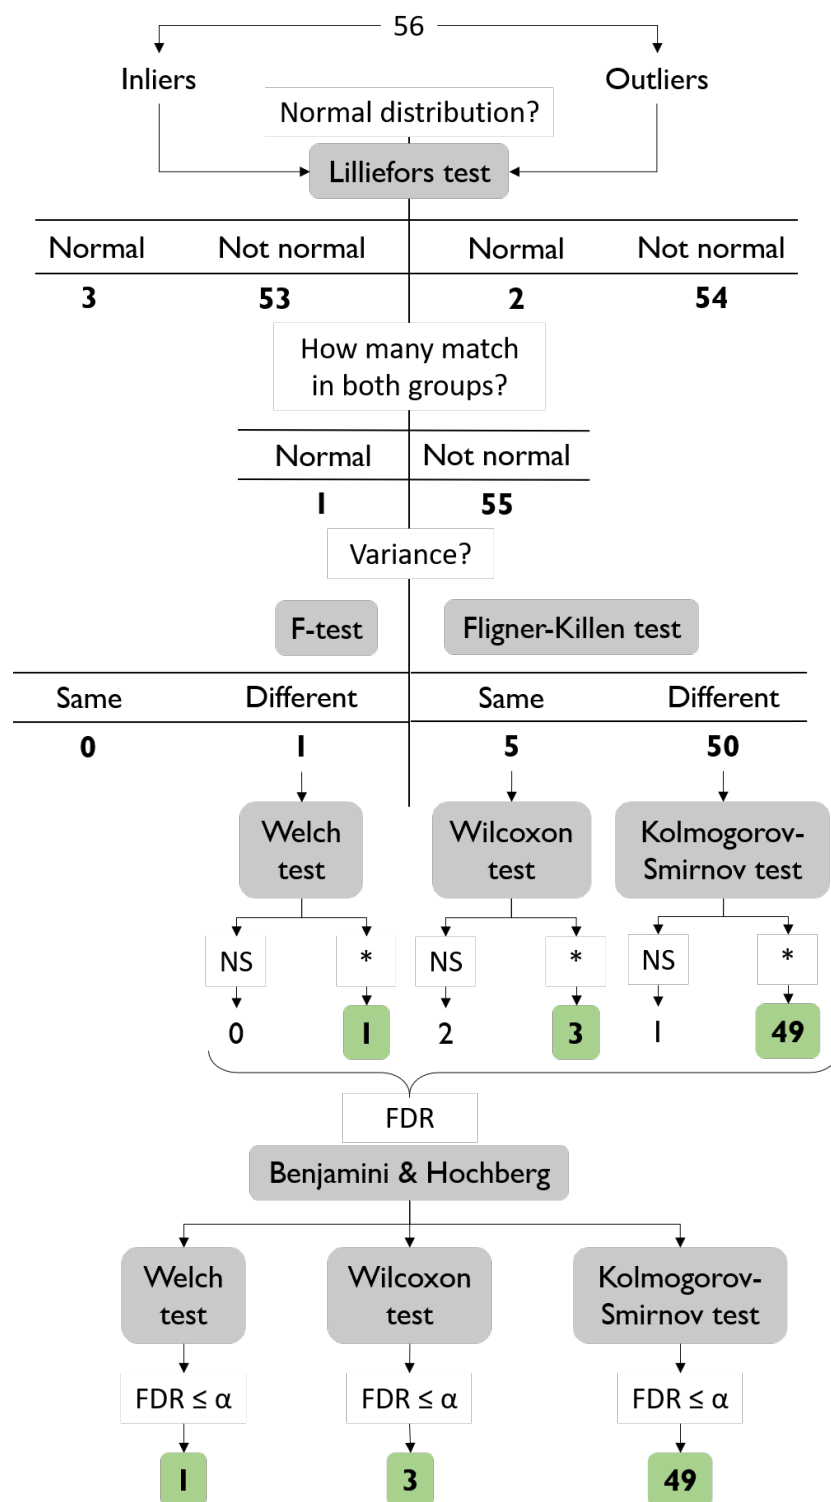

**Figure S3.** Statistical studies to identify differences between the distributions of 56 physicochemical properties from two groups; APD inliers and outliers.

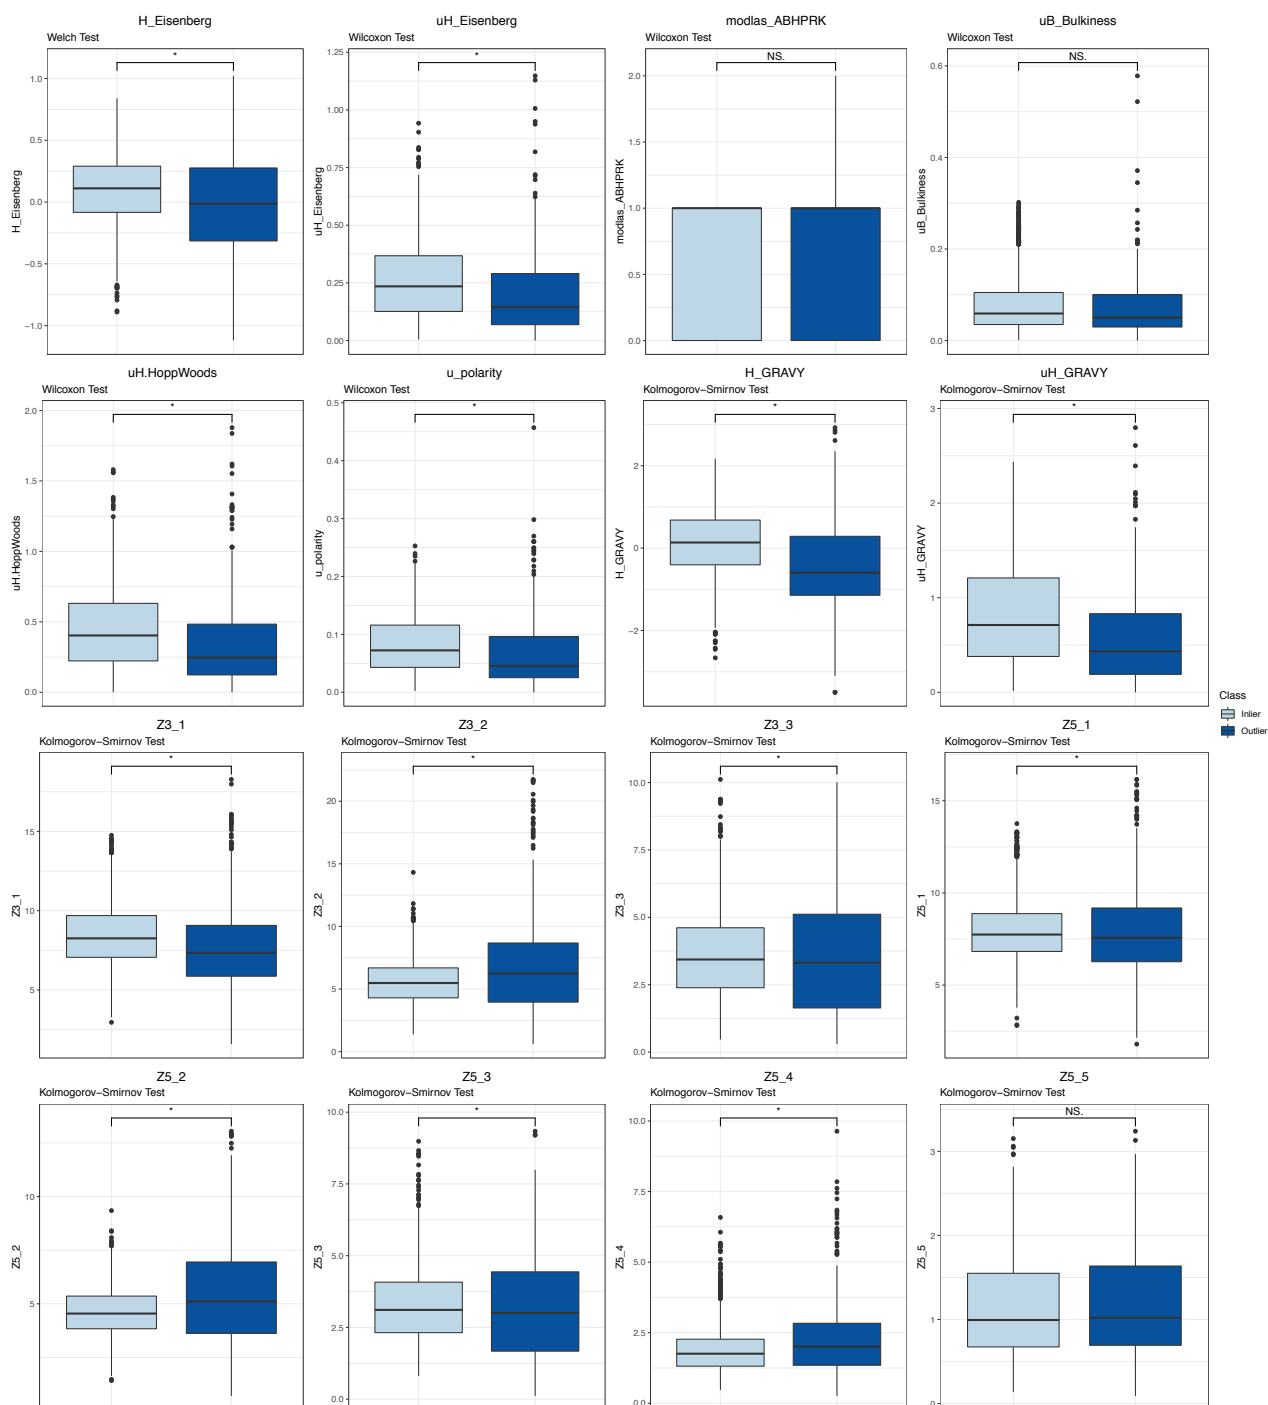

**Figure S4a.** Boxplots comparing the distributions for each of the first 16 physicochemical properties (1-16: H\_Eisenberg to Z5\_5) within inliers (cyan) and outliers (dark blue) groups. All properties were tested for statistical significance (\*, p-value < 0.001) using either Welch, Wilcoxon or Kolmogorov-Smirnov tests according to normality and variance.

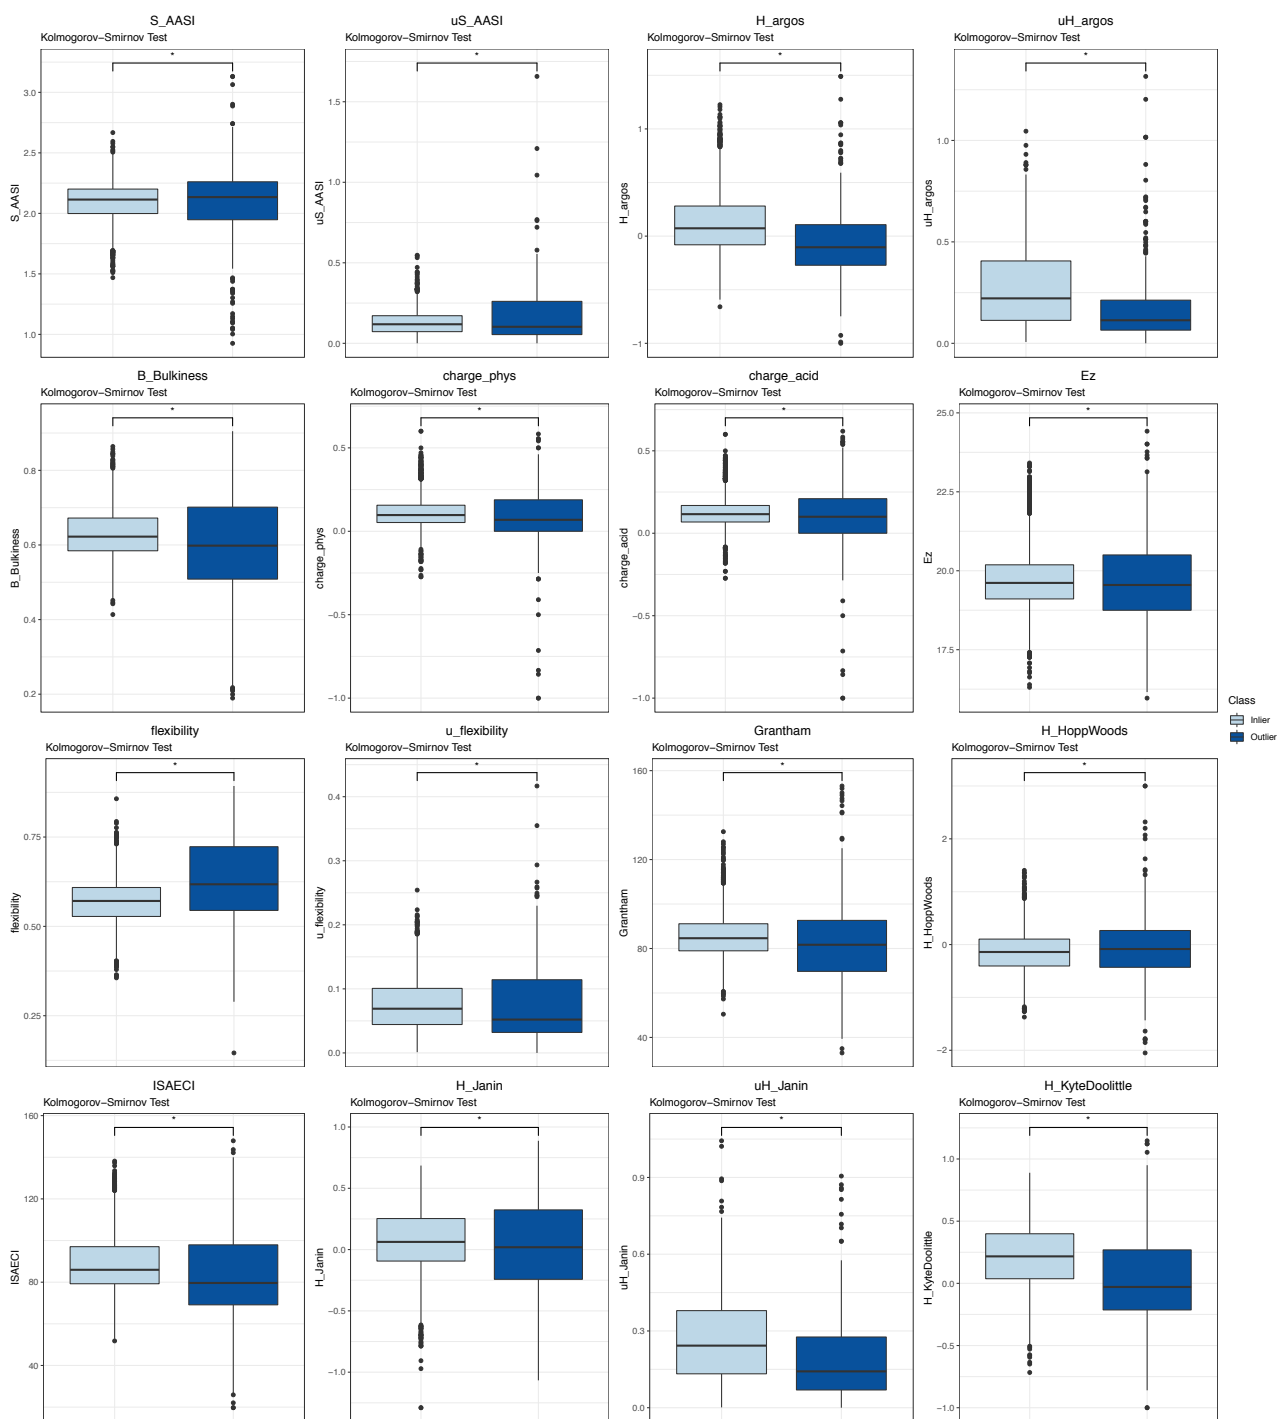

**Figure S4b.** Boxplots comparing the distributions for each of the 16 other physicochemical properties (17-32: S\_AASI to H\_KyteDoolittle) within inliers (cyan) and outliers (dark blue) groups. All properties were tested for statistical significance (\*, p-value <0.001) using either Welch, Wilcoxon or Kolmogorov-Smirnov tests according to normality and variance.

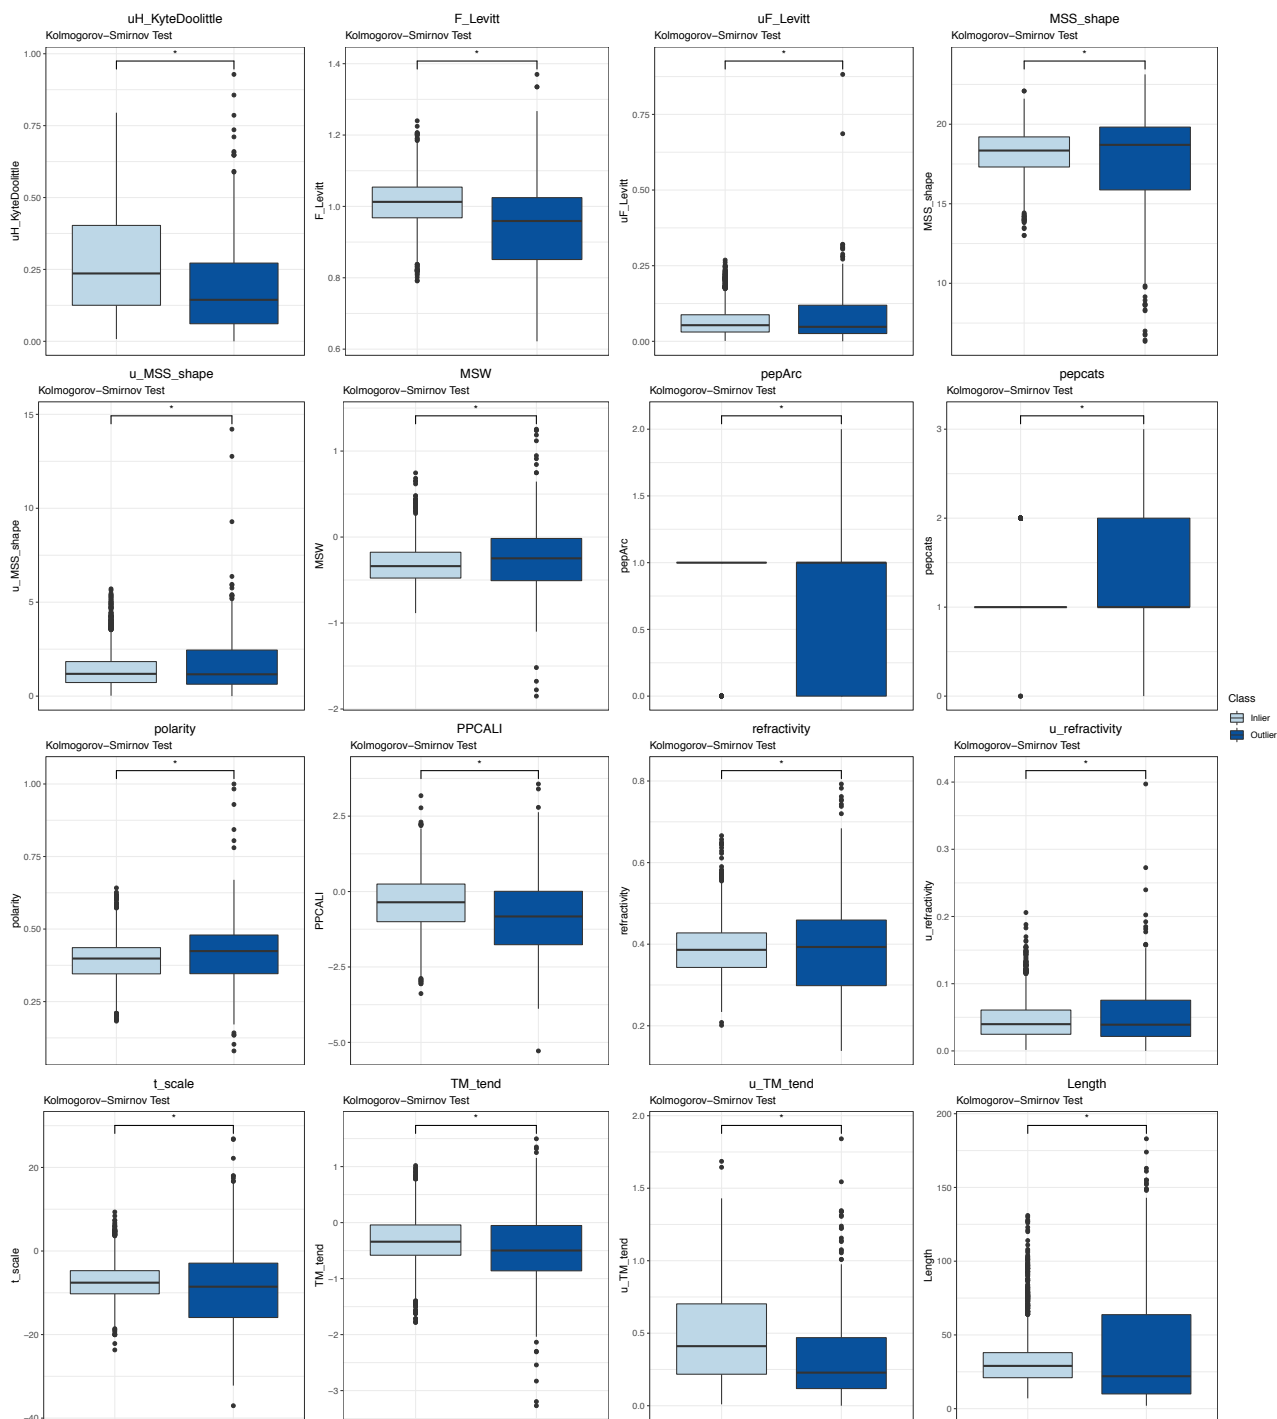

**Figure S4c.** Boxplots comparing the distributions for each of the 16 physicochemical properties (32-48: uH\_KyteDoolittle to Length) within inliers (cyan) and outliers (dark blue) groups. All properties were tested for statistical significance (\*,  $p$ -value  $< 0.001$ ) using either Welch, Wilcoxon or Kolmogorov-Smirnov tests according to normality and variance.

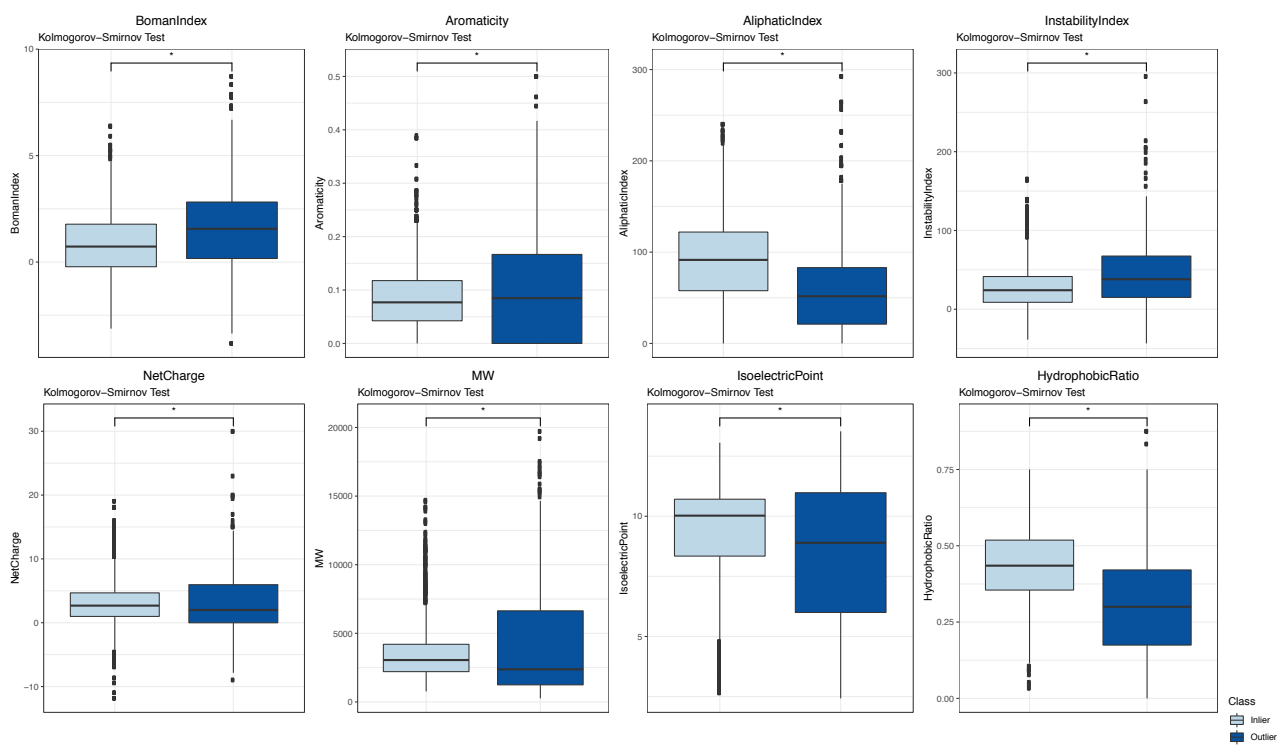

**Figure S4d.** Boxplots comparing the distributions for each of the 16 physicochemical properties (49-56: BomanIndex to HydrophobicRatio) within inliers (cyan) and outliers (dark blue) groups. All properties were tested for statistical significance (\*, p-value <0.001) using either Welch, Wilcoxon or Kolmogorov-Smirnov tests according to normality and variance.



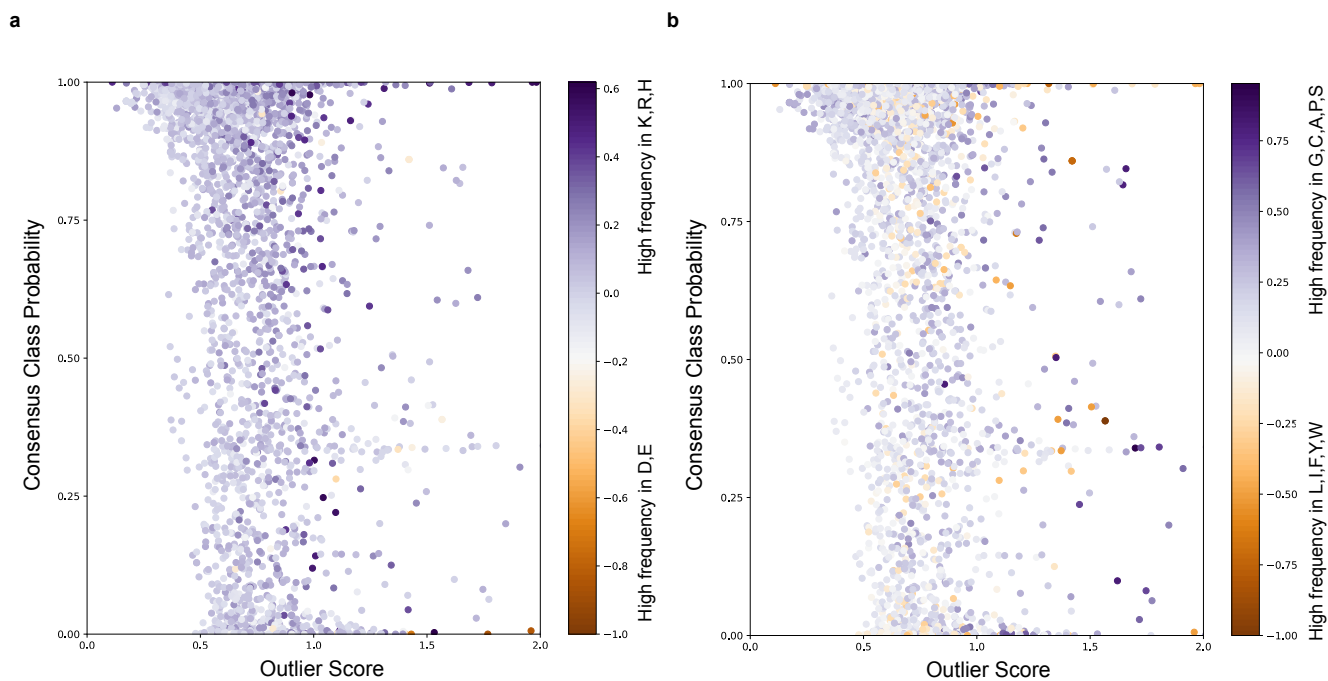

**Figure S5.** Scatterplots showing the distribution of 3,081 antimicrobial peptides (APD dataset) according to outlier scores and hemolytic (HemoPI-1) consensus class probabilities: a) Changes in colour gradient indicate differential enrichment in positively charged amino acids i.e. lysine, arginine, histidine (purple) or negatively charged amino acids i.e. aspartic and glutamic acids (orange). b) Changes in colour gradient indicate differential enrichment in small amino acids i.e. glycine, cysteine, alanine, proline, serine (purple) or bulky aromatic/aliphatic amino acids i.e. phenylalanine, tyrosine, tryptophan, leucine, isoleucine (orange).
